# 1 Genetic population structure across Brittany and the downstream 2 Loire basin provides new insights on the demographic history of 3 Western Europe

4  
5 Isabel Alves<sup>1¶</sup>, Joanna Gienza<sup>1¶</sup>, Michael Blum<sup>2</sup>, Carolina Bernhardsson<sup>3</sup>, Stéphanie Chatel<sup>1</sup>, Matilde  
6 Karakachoff<sup>1,4</sup>, Aude Saint Pierre<sup>5</sup>, Anthony F. Herzig<sup>5</sup>, Robert Olaso<sup>6</sup>, Martial Monteil<sup>7</sup>, Véronique  
7 Gallien<sup>8,9</sup>, Elodie Cabot<sup>8,10</sup>, Emma Svensson<sup>3</sup>, Delphine Bacq-Daian<sup>6</sup>, Estelle Baron<sup>1</sup>, Charlotte  
8 Berthelier<sup>1</sup>, Céline Besse<sup>6</sup>, Hélène Blanché<sup>11</sup>, Ozvan Bocher<sup>5</sup>, Anne Boland<sup>6</sup>, Stéphanie Bonnaud<sup>1</sup>,  
9 Eric Charpentier<sup>1</sup>, Claire Dandine-Roulland<sup>6</sup>, Claude Férec<sup>5</sup>, Christine Fruchet<sup>1</sup>, Simon Lecointe<sup>1</sup>,  
10 Edith Le Floch<sup>6</sup>, Thomas Ludwig<sup>5</sup>, Gaëlle Marenne<sup>5</sup>, Vincent Meyer<sup>6</sup>, Elisabeth Quellery<sup>1</sup>, Fernando  
11 Racimo<sup>12</sup>, Karen Rouault<sup>5</sup>, Florian Sandron<sup>6</sup>, Jean-Jacques Schott<sup>1</sup>, Lourdes Velo Suarez<sup>5</sup>, Jade  
12 Violleau<sup>1</sup>, Eske Willerslev<sup>12,13</sup>, Yves Coativy<sup>14</sup>, Mael Jézéquel<sup>14</sup>, Daniel Le Bris<sup>14</sup>, Clément Nicolas<sup>15</sup>,  
13 Yvan Pailler<sup>8,16</sup>, Marcel Goldberg<sup>17</sup>, Marie Zins<sup>17</sup>, Hervé Le Marec<sup>1</sup>, Mattias Jakobsson<sup>3</sup>, Pierre  
14 Darlu<sup>18</sup>, Emmanuelle Génin<sup>5</sup>, Jean-François Deleuze<sup>6,11</sup>, Richard Redon<sup>1\*</sup>, Christian Dina<sup>1\*</sup>

15  
16 <sup>1</sup> Nantes Université, CHU Nantes, CNRS, INSERM, l'institut du thorax, F-44000 Nantes, France.

17 <sup>2</sup> TIMC-IMAG, UMR 5525 CNRS, Univ. Grenoble Alpes, Grenoble, France.

18 <sup>3</sup> Department of Organismal Biology and SciLife Lab, Uppsala University, Uppsala, Sweden.

19 <sup>4</sup> Nantes Université, CHU Nantes, Pôle Hospitalo-Universitaire 11 : Santé Publique, Clinique des  
20 données, INSERM, CIC 1413, F-44000 Nantes, France.

21 <sup>5</sup> Univ Brest, Inserm, EFS, UMR 1078, GGB, F-29200 Brest, France.

22 <sup>6</sup> Université Paris-Saclay, CEA, Centre National de Recherche en Génomique Humaine (CNRGH),  
23 91057, Evry, France and Labex GenMed.

24 <sup>7</sup> Nantes Université, CNRS, Ministère de la Culture, CReAAH, LARA, UMR 6566, Nantes, France.

25 <sup>8</sup> INRAP - Institut national de recherches archéologiques préventives.

26 <sup>9</sup> CEPAM - Culture et Environnements, Préhistoire, Antiquité, Moyen-Age.

27 <sup>10</sup> Anthropologie Bio-Culturelle, Droit, Ethique et Santé, Faculté de Médecine Site Nord (UMR 7268),  
28 Marseille, France.

29 <sup>11</sup> Fondation Jean Dausset, CEPH, Paris, France and Labex GenMed.

30 <sup>12</sup> Lundbeck GeoGenetics Centre, GLOBE Institute, University of Copenhagen, Denmark.

31 <sup>13</sup> Department of Zoology, University of Cambridge, UK.

32 <sup>14</sup> Centre de Recherche Bretonne et Celtique, EA 4451, Université de Bretagne Occidentale, Brest,  
33 France.

34 <sup>15</sup> UMR 8215 Trajectoires, Centre Malher, 9 rue Malher, 75004 Paris.

35 <sup>16</sup> ArMeRIE UBO/INRAP, France; UMR 6554 LETG – Brest Institut Universitaire Européen de la  
36 Mer, Plouzané, France.

37 <sup>17</sup> Université Paris Cité, "Population-based Cohorts Unit", INSERM, Paris Saclay University, UVSQ,  
38 UMS 011, Paris, France

39 <sup>18</sup> UMR 7206 Eco-anthropologie, Musée de l'Homme, MNHN, CNRS, Université de Paris Cité.

40 <sup>¶</sup> These authors contributed equally to this work.

41 <sup>\*</sup> Jointly supervised this work.

42 <sup>#</sup> Current affiliation: Université de Strasbourg, CNRS, GMGM UMR 7156, Strasbourg, France.

43

44

45

46 Please address correspondence to:

47 Richard Redon, PhD  
48 L'institut du thorax  
49 Nantes Université, Nantes, France  
50 [richard.redon@univ-nantes.fr](mailto:richard.redon@univ-nantes.fr)

Christian Dina, PhD  
L'institut du thorax  
Nantes Université, Nantes, France  
[christian.dina@univ-nantes.fr](mailto:christian.dina@univ-nantes.fr)

## 51 **Abstract**

52 European genetic ancestry originates from three main ancestral populations - Western hunter-  
53 gatherers, early European farmers and Yamnaya Eurasian herders - whose edges geographically  
54 met in present-day France. Despite its central role to our understanding of how the ancestral  
55 populations interacted and gave rise to modern population structure, the population history of  
56 France has remained largely understudied. Here, we analysed the high-coverage whole-genome  
57 sequences and genome-wide genotype profiles of respectively 856 and 3,234 present-day  
58 individuals from the northern half of France, and merged them with publicly available present-  
59 day and ancient Europe-wide genotype datasets. We also explored, for the first time, the whole-  
60 genome sequences of six mediaeval individuals (300-1100 CE) from Western France to gain  
61 insights into the genetic impact of what is commonly known as the Migration Period in Europe.  
62 We found extensive fine-scale population structure across Brittany and the downstream Loire  
63 basin, emphasising the need for investigating local populations to better understand the  
64 distribution of rare and putatively deleterious variants across space. Overall, we observed an  
65 increased population differentiation between the northern and southern sides of the river Loire,  
66 which are characterised by different proportions of steppe vs. Neolithic-related ancestry.  
67 Samples from Western Brittany carry the largest levels of steppe ancestry and show high levels  
68 of allele sharing with individuals associated with the Bell Beaker complex, levels that are only  
69 comparable with those found in populations lying on the northwestern edges of Europe.  
70 Together, our results imply that present-day individuals from Western Brittany retain  
71 substantial legacy of the genetic changes that occurred in Northwestern Europe following the  
72 arrival of the Bell Beaker people c. 2500 BCE. Such genetic legacy may explain the sharing of  
73 disease-related alleles with other present-day populations from Western Britain and Ireland.

74  
75  
76  
77  
78  
79

## 80 Introduction

81 Understanding how genetic diversity is distributed within and between human populations (*i.e.*  
82 population structure) can shed light on the history of our species, and inform studies that search  
83 for genetic associations with traits and diseases (1). The increasing interest in elucidating the  
84 role of rare variation in complex traits, the consequent demand for surveying multiple local  
85 populations and the need for a detailed understanding of their evolutionary history has  
86 motivated multiple population genomic studies at a country-wide scale (2–5).

87 Located on one of the edges of the European landmass, Northwestern France includes the  
88 peninsula of Brittany, whose westernmost tip is named *Finistère* (*end of land*), and the  
89 surrounding region of *Pays-de-la-Loire*. The region is bordered by the English Channel to the  
90 north and the Bay of Biscay to the south, and is crossed by the Loire River - the largest river in  
91 France. From a linguistic point of view, this region has been the stage of long-term contacts  
92 between Celtic and Gallo-Romance spoken forms. The first evidence of modern human  
93 occupation of Northwestern France is associated with the Early Aurignacian culture, dating  
94 between about 43,000-37,000 years ago (6). However, population occupation in the region may  
95 have been scarce up to the Middle/Late Neolithic. It is during this period that megalithic  
96 construction appears in the archaeological record (6). The peninsula of Brittany hosts the oldest  
97 (7) and some of the biggest megalithic monuments (stone rows, long barrow and passage  
98 tombs) and one of the highest concentrations thereof. The Neolithic culture in Northwestern  
99 France largely derives from the Danubian Wave, also known as the Linear Pottery culture (8,9),  
100 although the presence of pottery with shell impressions in regions south of the Loire river raises  
101 the possibility of Mediterranean influence in the neolithization of the region (9). Genetic  
102 evidence suggests that the introduction of the France Neolithic lifestyle occurred through a  
103 complex interaction between the two Neolithic waves - the Danubian and the Mediterranean  
104 wave - and local, likely genetically structured, populations of hunter-gatherers (10–12). Both  
105 archaeological and genetic evidence suggest strong connectivity among the populations along  
106 the Atlantic façade from 4500 BC onwards, from Northern Iberia to Ireland and Western Britain  
107 (13). Although Northwestern France was likely part of the Atlantic façade with respect to its  
108 genetic landscape, there is no ancient DNA data currently available from the Neolithic period.

109 The connectivity along the western fringes of the European continent continued during the  
110 Early Bronze Age as suggested by the presence of a common Bell Beaker pottery style, usually  
111 known as the “Maritime” style (14,15), and further related artefacts (16). In addition, the Bell  
112 Beaker complex in Northwestern Europe is closely associated with the appearance of copper  
113 metallurgy (17). In Britain, the arrival of the Bell Beaker complex has been recently associated  
114 with a major genetic ancestry shift disrupting the preceding genetic homogeneity of the Atlantic  
115 façade and introducing genetic ancestry related to the Yamnaya migration from the Eurasian  
116 Steppes (18). These findings contrast with what has been found in Iberia, where Beaker-  
117 complex-associated individuals show low genetic affinity with those from central Europe  
118 suggesting considerable heterogeneity underlying the mode of transmission of the Bell Beaker  
119 complex. Within France, Yamnaya-related ancestry has been primarily found among Bell-  
120 Beaker associated individuals from the Northeastern and Southern parts of the country,  
121 although ancestry proportions widely vary across samples (10,11). However, the lack of

122 samples from Northern and Northwestern France before the Iron Age hinders the full  
123 understanding of the introduction of Steppe ancestry along the westernmost part of the North  
124 Sea and the English Channel. In Northern France, the Iron Age is genetically characterised by  
125 high levels of Steppe-ancestry and a homogenization of it, suggesting continuous cultural  
126 change instead of a massive migration underlying the arrival of iron technology (19). In the  
127 Iron Age, Brittany was called *Aremorica* and was part of the Gaul. It was home to multiple  
128 Celtic-speaking tribes, like the Veneti and Osismii in the west of the peninsula (20).

129 During the Roman Empire, Roman influence reached Brittany, as attested by the presence of  
130 Roman-style villas and sanctuaries. However, such influence was far smaller in Northwestern  
131 France than in other parts of the Gaul (21). With the decline of the Roman Empire (around the  
132 3rd century CE), Northern France became progressively ruled by the early mediaeval kingdoms  
133 (22). However, the history of Brittany remains largely unknown from the late Antiquity (4th-  
134 5th century CE) up to the 9th century CE, when it was conquered by Frankish Carolingian  
135 Emperors and put under native rulership (23). Interestingly, it was during this period that the  
136 peninsula acquired the name of “Britannia”. Linguistically, places' names and the still-  
137 surviving language closely related to Cornish and Welsh imply that extensive connections took  
138 place with Western Britain. Nevertheless, whether such a process involved small or large  
139 settlements from the British Isles, as often suggested, or is the basis of the Breton language is  
140 still under debate (24–27). Archaeological evidence displays changes in architecture and  
141 funerary rituals during this time. However, they reflect a mixture of influences, rather than a  
142 single major contribution, from the British Isles and French regions along the British Channel  
143 as well as from Germany (28).

144 Northwestern France has been the end point of multiple continental prehistoric migrations and  
145 occupied a central place in trading routes along the Atlantic façade (29). Understanding the  
146 genetic makeup of Northwestern France can inform on the complex interaction between the  
147 European-wide demographic events that have culminated in the present-day genetic landscape.  
148 However, a systematic assessment of patterns of population structure in Northwestern France  
149 and an identification of the past demographic events that have shaped them is still lacking. In  
150 this study, we analysed 3,234 genome-wide genotyped samples together with 620 high-  
151 coverage whole-genome sequences (WGS) from Brittany and *Pays-de-la-Loire*. Also, to put  
152 the genetics of Northwestern France into context we used an additional set of 236 WGS from  
153 other regions in France and merged the WGS with available datasets encompassing a  
154 geographically diverse set of present-day and ancient European samples. Last but not least, we  
155 analysed, for the first time, a set of western French mediaeval samples dated from c. 400 to  
156 1100 CE in order to fill in the gap with respect to the lack of publicly available genome-wide  
157 data from the last two millennia.

158

## 159 Results

### 160 *Haplotype-based population structure in Northwestern France*

161 To explore patterns of genetic structure among the population in Northwestern France, we first  
162 applied the haplotype-based approach implemented in fineSTRUCTURE (vs4.1) (30) on  
163 210,171 SNPs genotypes from 3,234 individuals from Brittany and *Pays-de-la-Loire* (see  
164 Methods). Genome-wide data revealed extensive population structure in Northwestern France  
165 with 154 clusters inferred, of which 78 contain more than 10 individuals (Fig. S1.1). At this  
166 finest scale, levels of clustering were similar to those previously found for Spain (3), and larger  
167 than those previously reported for France (31) and Great Britain (5). We investigated whether  
168 recent ancestry due to the sampling scheme carried out in this study impacts the clustering  
169 patterns and we found no evidence of such an effect (see Methods and Fig S1.2-S1.4). Pairs of  
170 individuals within clusters are not more closely related than pairs of individuals across the  
171 whole dataset.

172 At the coarser level  $k=3$  (Fig. 1a) of the fineSTRUCTURE tree (FS tree), we found that the  
173 distribution of one of the clusters, hereafter referred to as the “Western Brittany” (WBR)  
174 cluster, broadly overlaps with the linguistic distribution of the Breton language. The cluster’s  
175 border falls between the easternmost (Loth line 1) and the westernmost (Loth line 2) estimated  
176 historical bounds of the Breton language (Fig. 1b). A second cluster, hereafter referred as  
177 “Eastern Brittany and Pays-de-la-Loire” (EBP), encompasses individuals from eastern Brittany  
178 (*département* Ille-et-Vilaine) and the area of *Pays-de-la-Loire* situated north of the river Loire.  
179 A third cluster, hereafter referred to as “South Loire” (SLO), covers the part of the *Pays-de-la-*  
180 *Loire* situated south of the river Loire.

181 The relative distributions of these clusters mimic those of surnames across the entire region, as  
182 inferred through a Neighbour Joining Tree (Fig. 1c). The three surname-based clusters are  
183 highly supported by the bootstrap analysis ( $> 75\%$ ). Interestingly, the surnames from the  
184 northern part of *Pays-de-la-Loire* are more closely related to those from south Loire than to  
185 those from Brittany. Furthermore, while the highest level of differentiation is observed between  
186 WBR and SLO ( $F_{ST}=0.00107$ ),  $F_{ST}$  values indicate larger population differentiation between  
187 EBP and SLO than between EBP and WBR (respectively 0.00042 vs. 0.00028, Fig. S1.5).  
188 Together we found evidence that the river Loire influences population differentiation, likely  
189 acting as a barrier to gene flow.

190 For higher levels of clustering resolution ( $k > 3$ ), because the FS tree depends on the sample  
191 sizes (30) and might not reflect haplotype sharing differences between pairs of clusters (32),  
192 we computed the clustering tree based on the total variation distances (TVD tree, (5,32)).  
193 Indeed, when assessing the performance of the two tree-building algorithms (see SOM for  
194 details) by computing cluster assignment confidence (5), we found that for the same  $k$  the FS-  
195 tree shows lower cluster assignment confidence than the TVD-based tree (Fig. S1.6). We chose  
196  $k=39$  and to ease visualisation we merged small-sized clusters (1-5 individuals) with the closest  
197 large cluster ( $\geq 31$  individuals) resulting in 18 clusters ( $>31$  individuals each). As a result, the  
198 north Loire region splits into nine clusters, four of which in the westernmost part of Brittany,  
199 while individuals from south Loire split also into nine clusters (Fig. 1d). Overall, we retrieved  
200 a TVD-tree largely consistent with the fineStructure tree at  $k=3$ , with the exception of samples

201 located at the borders between the three main clusters (e.g., individuals assigned to the Malo-  
202 Rennais cluster of the TVD-tree)". In the resulting 18 clusters, individuals from the  
203 westernmost part of Brittany are grouped into four clusters: "Cornouaille", "Léon", "Vannes"  
204 and "Bretagne-Centre", while individuals mostly from south of the Loire river cluster into  
205 nine clusters (Fig. 1d). Samples geographically located between these regions are grouped into  
206 five clusters: "Malo-Rennais", "Nantes", "Gérande", "Maine-Anjou" and "Ancenis". The  
207 coancestry matrix for the 18 clusters (Fig. S1.6) reveals a global pattern of increased coancestry  
208 within clusters, as expected after a history of shared drift between individuals in the same group,  
209 with the exceptions of the clusters 'Sèvre' and 'Vendée-Est'.

210 The cluster "Maine-Anjou" encompasses the largest number of individuals (n=799) and covers  
211 by far the largest geographical area, revealing broader genetic homogeneity relative to the other  
212 regions. Most of the other clusters appear to have contributed to the coancestry of this large  
213 cluster, indicating that cluster haplotype homogeneity may result from repeated admixture into  
214 the region (Fig. S1.7).

215 The second largest cluster (n=344), "Bretagne-Centre", stretches from the northern to the  
216 southern coast of Brittany indicating the existence of a corridor of relative genetic homogeneity  
217 connecting the two sides of the peninsula (see SOM for details). While the neighbouring  
218 clusters "Leon", "Cornouaille" and "Vannes" display large within-cluster but low between-  
219 cluster coancestry (Fig. S1.7), despite their close geographic proximity, each of them appears  
220 to have contributed to the coancestry of the "Bretagne-Centre" cluster. When considering the  
221 area located south to the river Loire, most clusters— and particularly "Mauges 1" and "Mauges  
222 2" - appear to have largely contributed to the coancestry of the "Sèvres" cluster in eastern  
223 Vendée. In contrast, the "Mauges [1-3]" and "North-Vendée" clusters show low coancestry  
224 from most of the other clusters and large within-cluster coancestry, likely indicating stronger  
225 genetic drift within these groups. Finally, we observed a low contribution of the clusters south  
226 of the river Loire to the coancestry of those from the westernmost part of Brittany, indicating  
227 that gene flow between these two areas has been relatively limited, in agreement with the  $F_{ST}$   
228 values obtained between the 18 clusters (Fig S1.8).

229  
230 We then explored identity-by-descent (IBD) sharing between pairs of individuals belonging to  
231 the 18 clusters (Fig S1.9), and measured average length of runs of homozygosity (ROH) across  
232 individuals within administrative circumscriptions in Northwestern France (Fig. S1.10). Higher  
233 levels of identity-IBD sharing for chromosomal segments of any size as well as increased length  
234 of ROH were observed between the clusters "Mauges [1-3]" and "Vendée-Nord", indicating  
235 that low effective population sizes may explain the particular population structure found in this  
236 restricted area. Similar patterns were observed within Brittany. However, considering that  
237 increased IBD sharing within the westernmost clusters of Brittany is only observed for  
238 chromosome segments under 7cM (Fig. S1.9), lower effective population sizes within this  
239 cluster are likely more ancient than for "Mauges [1-3]" and "Vendée-Nord". Overall, these  
240 results fit with those based on the coancestry matrices and  $F_{ST}$  values (Fig S1.8).

241 *Relationship between fine genetic structure, linguistics and geography*

242 In order to elucidate whether particular cultural features can explain the observed genetic  
243 structure, we explored spatial language and surname distribution potentially coinciding with  
244 cluster borders. First, we found that the cluster “Bretagne-Centre” overlaps largely with the  
245 dialectal area featured by the use of two initial consonants - the aspirated [h] instead of an  
246 unaspirated, and the alveolar fricative [z] instead of [s] (Fig. S1.11 and Supplementary Data).  
247 Similarly, we observed substantial overlap between the “Cornouaille” cluster and the area with  
248 palatalization of -h- [h] into -y- [j] (Fig. S1.12; see Supplementary data). Second, we observed  
249 high correlation between pairwise  $F_{ST}$  values and surname-based distances (Fig. S1.13), even  
250 after correcting for geographical distances (Partial Spearman correlation = 0.68). To illustrate  
251 this finding, the “Leon” and “Malo-Rennais” cluster locations match those of the surname  
252 clusters Brest/Morlaix and Saint-Malo/Dinan, respectively (Fig. 1c). Overall, these  
253 observations support the hypothesis that language has played a role in shaping the genetic  
254 structure currently observed in Northwestern France.

255  
256 In parallel, we checked whether rivers other than the Loire could have driven population  
257 differentiation at a finer scale, and observed repeated overlap between river courses and cluster  
258 borders (Fig S1.14). For instance, the clusters “Lèon” and “Cornouaille” are respectively  
259 delimited to the east by the Morlaix River and Laïta-Ellé rivers, and separated from each other  
260 by the river Aulne. “Vannes” is enclosed to the west by the Blavet river and to the north by the  
261 Oust. The “Nantes” cluster is bordered by the rivers Semnon and Vilaine to the north and the  
262 west, respectively, while the “Malo-Rennais” cluster’s borders co-localize with the Gouessant  
263 and the Yvel - Hivet to the west. In South Loire, the cluster “Vendée-Atlantique” is bordered  
264 to the southwest by the river Lay (Fig. S1.14). Finally, when inspecting clusters at  $k=78$  within  
265 the area of “Maine-Loire”, we could observe recurrent proximity between cluster borders and  
266 the waterways of Mayenne, Vègre and Loir (data not shown). These recurring coincidences of  
267 watercourses with genetic cluster borders, while not formally tested, may reflect the impact of  
268 rivers on local demographics.

269 *Evolution over time of effective population sizes*

270 We estimated the historical dynamics of effective population size ( $N_e$ ) using IBDNe (33), and  
271 observed 12-, 5- and 5.2-fold increases in  $N_e$ , respectively for WBR, EBP and SLO, in the last  
272 1,450 years (assuming a generation time of 29 years; Fig. S1.15a). Such expansions have led  
273 to present-day population sizes of around  $10^{5.5}$  to  $10^{5.7}$  individuals for the three clusters, which  
274 is broadly consistent with the explosive population growth estimated for other European  
275 populations (34–36). However, the  $N_e$  trajectories differ between clusters (Fig. S1.15a).  
276 Indeed, while WBR shows the smallest  $N_e$  in the Early Mediaeval Period (~5th century CE),  
277 its effective population size surpassed that of SLO by the High Mediaeval Period (~1000 CE).  
278 This suggests that population expansion started earlier in WBR than in SLO, which kept a stable  
279  $N_e$  until the 10 last generations (i.e., 17th century CE). Reduced  $N_e$  at recent times explain the  
280 stronger IBD sharing observed between the clusters “Mauges [1-3]” and “Vendée-Nord” for  
281 chromosome segments  $> 7cM$ . Finally, the  $N_e$  trajectories in EBP and SLO show a slight and  
282 short population decline, starting around 1230-1350 CE and lasting for almost ~300 years (Fig.  
283 S1.15a). Similar patterns have been previously described in French and other European



284 populations and putatively associated with the Black Death (31,34). However, we caution that  
285 the  $N_e$  profiles suggesting a bottleneck are not consistently observed across different thresholds  
286 for the minimum chromosome length (Fig S1.15b-d). In addition, our computer simulations  
287 suggest that multiple demographic scenarios (e.g., population structure within the EBP and  
288 SLO samples) generate similar  $N_e$  profiles (see SOM for details, Fig. S6). Historical evidence  
289 that the Black Death had a lesser demographic impact in Western Brittany is lacking, although  
290 recent studies refining its impact through pollen record support a lighter effect of the epidemics  
291 in Brittany (37).

### 292 *Fine-scale population structure based on rare variants*

293 Population stratification based on rare variation is typically stronger than with common  
294 polymorphism (1,38) and rare variants are particularly informative to infer recent fine-scale  
295 population structure. Here, we computed allele sharing between pairs of individuals originating  
296 from Brittany and *Pays-de-la-Loire* using genotypes from 620 high-coverage whole-genome  
297 sequences (see Methods). We computed independently two matrices, reporting genotypes with  
298 minor allele counts equal to two (MAC 2) and ranging from 3 to 10 (MAC 3-10), respectively.  
299 We applied hierarchical clustering to both matrices to cluster individuals according to patterns  
300 of allele sharing. When assuming three population groups ( $k=3$ ), most individuals from the  
301 three westernmost *départements* of Brittany are clustered into a single group, both for MAC 2  
302 and MAC 3-10 (Fig. 2). The proportion of individuals assigned to this cluster decreases as one  
303 moves away from Western Brittany, regardless of the allele count category, and the two  
304 alternative clusters become more prevalent. Similarly, to the fineSTRUCTURE findings, these  
305 results provide evidence for relative differentiation between traditionally Breton-speaking  
306 populations in Western Brittany and their Gallo-speaking neighbours.

307 Interestingly, we identified a genetic component restricted to the *départements* located south to  
308 the river Loire for  $k=4$  (cluster\_2) for MAC 3-10 (Fig. 2, Fig. S2.1). For MAC 2 alleles we  
309 found this cluster only at  $k=9$  (cluster\_2). Assuming that alleles with MAC 2 (minor allele  
310 frequency  $\approx 0.0016$ ) tend to be more recent, these results suggest that population structure does  
311 not result from reduced gene flow between the northern and southern shores of the river in the  
312 very near past (average doubleton age  $\sim 500$  years (39)). Consistently, we found no significant  
313 differences in surname distributions between the riversides across *arrondissements* crossing the  
314 Loire (data not shown). Clustering patterns within Brittany are, on the other hand, consistent  
315 across the full range of allele counts, indicating that population differentiation associated with  
316 traditionally Breton-speaking groups has persisted to modern times.

317 With MAC 2 alleles, increasing  $k$  from 3 to 10 assign individuals from neighbouring  
318 *départements* into 7 additional geographically restricted clusters (Fig. S2.1), suggesting similar  
319 patterns of population structure as found with fineSTRUCTURE (Fig. 1d). Although an  
320 exhaustive comparison with fineSTRUCTURE results is beyond the scope of this study, this  
321 general concordance in clustering patterns emphasises the power of rare variants to infer fine-  
322 scale population structure. With MAC 3-10 alleles, increasing  $k$  tends to generate smaller  
323 clusters with relatively large geographical distribution, likely reflecting a relative lack of  
324 resolution to detect population structure (Fig. S2.1).

### 325 *Brittany in the context of France*

326 To investigate population structure on a larger geographical scale, we enriched our dataset with  
327 additional WGS-based genotypes from 233 individuals originating from neighbouring French  
328 areas (see Methods). We first performed principal component analysis (PCAs) based on  
329 common and low-frequency variants (Fig. S2.2). While population differentiation based on  
330 common variants separates mostly Brittany from the remaining regions, low-frequency variants  
331 disclose a more subtle population structure, as previously reported (38,40), with additional  
332 separation between Northeastern and Southwestern France (for further details, refer to Génin  
333 *et al.*, manuscript in preparation). Pairwise  $F_{ST}$  values also support stronger differentiation  
334 between WBR (Fig. 1d) and the remaining populations (Fig. S1.5). In subsequent analyses, we  
335 will consider individuals from Brittany and *Pays-de-la-Loire* according to the three clusters  
336 shown in Fig. 1a (WBR, EBP and SLO), unless stated otherwise.

### 337 *Brittany in the European context*

338 To further investigate the genetic history of people from Northwestern France, we first  
339 performed a PCA on our entire WGS dataset merged with genotype data from 20 diverse  
340 Northern and Western European populations (41,42). In agreement with the previously reported  
341 isolation-by-distance pattern in Europe (43), we found that French samples are continuously  
342 distributed along the axis connecting Southwestern (i.e., Spain) and Northwestern (i.e.,  
343 Ireland/UK) Europe (Fig. 3a). Individuals from Central/Southwestern France appear closer to  
344 samples from Spain whereas individuals from Brittany appear at the other extreme and closer  
345 to samples from Ireland/UK. While individuals from Brittany fall onto the axis and overlap  
346 with the Irish, Welsh and Cornish samples, samples from Eastern Great Britain show a slight  
347 shift towards Central Europe. These results support the idea of increased genetic proximity  
348 between Brittany and Ireland, as previously suggested (44). In contrast with Brittany and  
349 similarly to what we observe for samples from Eastern Great Britain, individuals from Northern  
350 and Eastern France show a slight shift towards Central Europe (represented here mainly by  
351 Germany).

352 To further investigate the contribution of other European populations to the genetic makeup of  
353 Northwestern France we used the regression-based statistical approach implemented in  
354 GLOBETROTTER software (45). We found that all of the seven French populations showed  
355 evidence of admixture ( $P < 0.0001$ ). In agreement with the PCA results, three main sources of  
356 ancestry – North/Central, Northwestern and Southwestern Europe - were consistently found  
357 across these seven populations. The North/Central component derives mainly from Denmark  
358 and/or Belgium, the Northwestern component from Ireland and the Southwestern one from  
359 Spain and/or Italy (Fig. S3.2). While *Hauts-de-France* (HAU) and *Grand Est* (GRA) ancestries  
360 show evidence of single admixture events, with predominant and similar contributions from  
361 the North/Central and the Southwestern components, the remaining populations (BRE, NOR,  
362 PAY and NOU) show evidence of multiple waves of admixture (the best-guess model could  
363 not be inferred for CEN). PAY (*Pays-de-la-Loire*) and NOU (*Nouvelle-Aquitaine*) show  
364 evidence of mixed ancestries of predominant Southwestern European origins and the  
365 population of Brittany (BRI) was found to trace back ~23.5% of its DNA to Ireland vs. 14% or  
366 less found in any other French population. Brittany is also the region where Cornwall has  
367 contributed the most to ancestry (~9% vs. 3.1-3.4% across the remaining populations).

368 To confirm the proportions of ancestry in relation with these external groups, we performed  
369 supervised clustering considering Ireland, Germany and Spain as putative sources of ancestry  
370 for the French samples. We found that the Irish component accounts for >75% of the ancestry  
371 in ~50% of the individuals from Brittany (Fig. 3b), while it contributes to a much lesser extent  
372 to the genetic composition of the other regions (8-33%). On the other side of the spectrum, a  
373 Spanish-like component accounts for the largest proportion (~70%) in *Nouvelle-Aquitaine*  
374 (NOU), while German-like ancestry is predominant among individuals from Northern and  
375 Eastern France (*Normandie*, NOR; *Hauts-de-France*, HAU; *Grand Est*, GRA), with its  
376 proportion increasing with the geographical proximity to the German border.

377 When considering the three clusters inferred by fineSTRUCTURE in Northwestern France, we  
378 observe the same ancestry pattern for WBR as for Brittany, with a major Irish component.  
379 Consistently with this result, the smallest  $F_{ST}$  values between the WBR group and other non-  
380 French populations were retrieved with the Irish and Northern Irish populations (0.00057 and  
381 0.00062, respectively, Fig. S3.3). The only French population showing lower pairwise  $F_{ST}$  with  
382 WBR is the neighbouring EBP ( $F_{ST}$ =0.00028, Fig. S1.5). Finally, among the three clusters,  
383 SLO carries the largest Spanish-related ancestry while EBP carries similar proportions of the  
384 Irish- and Spanish-related components, reflecting its intermediary position between WBR and  
385 SLO. In summary, our results indicate that people from Brittany show strong genetic affinities  
386 with populations from Western Britain and Ireland, although separated by the Celtic sea.

387 To measure the relationship between the genetic clusters found in Northwestern France and  
388 other European populations, we used the *outgroup*  $f_3$ -statistics to assess the genetic drift shared  
389 by pairs of populations relative to the outgroup population (Mbuti)(46,47). Given that this  
390 statistic reflects the length of the branch from the internal node to the outgroup (connecting the  
391 pair of populations being tested), it is not affected by lineage-specific genetic drift, contrarily  
392 to  $F_{ST}$ . We found that most French clusters located north of the river Loire share the largest  
393 drift with Southwestern Welsh populations (i.e., from Dyfed), whereas those located south to  
394 the river Loire share the largest drift with the Basques (Fig. 3c, Table S1.1). The *f<sub>4</sub>-statistics* of  
395 the form  $f_4(\text{Mbuti, French subgroup; Dyfed, X})$ , which should produce significantly positive  
396 values when the tested population shares more alleles with X than Dyfed, show that the French  
397 subgroups from areas south to the river Loire consistently share more alleles with the Basques  
398 than with the Southwestern Welsh. Conversely, those located north to the river Loire share the  
399 largest amount of alleles with Southwestern Welsh and other populations from Great Britain  
400 and Scandinavia (Fig. 3d, Fig. S3.4).

#### 401 *Genetic continuity since mediaeval times*

402 To disentangle the sources of ancestry contributing to the modern French genetic makeup, we  
403 merged our WGS data with the largest available compilation of ancient (>3000 samples  
404 including ~400 ancient Vikings) and modern samples (>5000)(48,49). In addition, we  
405 sequenced six individuals with dates ranging from the 4th to the 12th century CE, from *Pays-*  
406 *de-la-Loire* (Fig. 4a) to increase our resolution in detecting changes in ancestry during the  
407 Mediaeval Period. PCA resulting from projecting the ancient individuals onto the principal  
408 component space of modern variation shows that most of the samples fall well within the  
409 distribution of present-day French (Fig. S4.1). Out of the six individuals, one (fra009, Table

410 S2.1) likely represents a migrant with genetic affinities to present-day North Africans. This  
411 individual, dated from the 5th-6th century CE, was found in an archaeological site located in  
412 an ancient town likely built during the Roman period (see SOM, Supplementary archaeological  
413 details). Trading networks involving this town may explain the presence of North African  
414 migrants so far north. To test whether French Mediaeval samples from the 3-4th century CE  
415 and samples from the 6-7th century CE significantly differ in their genetic affinities to other  
416 ancient European populations we computed the  $f_4$ -statistics of the form  $f_4(Mbuti, ancient$   
417  $European\ sample; sLoire\_France\_3-4cCE, sLoire\_France\_6-7cCE)$ . We found no significant  
418 differences in allele sharing between individuals from early (300-550 CE, fra001 and fra004)  
419 and later Mediaeval Period (600-700 CE, fra016 and fra017, Table S2.2). Therefore, we  
420 considered individuals from both periods to represent the same population and refer to them as  
421 “Mediaeval French”.

422 To check for ancestry changes since the Mediaeval Period, we tested whether Mediaeval French  
423 individuals are a good proxy source for the ancestry of present-day Northwestern French. To  
424 do so we used the modelling approach implemented in *qpAdm* (50) and we tested one-way  
425 models (i.e., genetic continuity) using the five Mediaeval French individuals as surrogate  
426 source population for the present-day French. Our results support genetic continuity between  
427 the eight present-day French populations (WBR, EBP, SLO, NOR, HAU, GRA, CEN and  
428 NOU) and Mediaeval French ( $P > 0.05$ , Table 1). *qpAdm* modelling results are consistent with  
429 the PCA showing that Mediaeval French from *Pays-de-la-Loire* fall within the distribution of  
430 modern individuals from the same region. Due to constraints in sample overlap between our  
431 SNP-array and WGS datasets, the randomly selected individuals within WBR do not cover the  
432 full geographic distribution of the initial cluster (*départments*: Morbihan, Finistère and Côtes-  
433 d’Armor) with the *département* of Finistère being mostly underrepresented. Hence, we tested a  
434 one-way model using only individuals from the westernmost *département* (*Finistère*) of  
435 Brittany and we found evidence ( $P = 0.0169$ ) for no continuity between Mediaeval samples and  
436 present-day individuals from Finistère. Due to the fact that model fit *p-values* can be affected  
437 by factors such as sample size and coverage, *p-values* comparison should be avoided.  
438 Nevertheless, given that we kept the same sample sizes ( $n=25$  with the exception of NOR with  
439  $n=19$ ) and differences in coverage should be minimal due to the quality of our sequencing, it is  
440 tempting to argue that the lack of continuity when using only samples from Finistère might  
441 reflect ancestry variation already present during Mediaeval times. An alternative scenario  
442 could, for instance, include later migrations from a non-French source likely through the sea.  
443 We also found that one-way models using ancient Northwestern Europeans, such as those  
444 dating of the Roman period in Great Britain, fit the ancestry of French populations north of the  
445 Loire ( $0.074 < P < 0.936$ ; WBR, EBP, NOR, HAU and GRA; Table S2.3) but do not fit the  
446 ancestry of those south of the river ( $P < 0.05$ , CEN, SLO and NOU). Furthermore, Italians  
447 dating from the early modern period with a central European ancestry fit modern French from  
448 south of the river Loire ( $P > 0.05$ ). Interestingly, ancient Spanish reported as Celtiberians or  
449 from the Mediaeval period do not generally fit contemporary French (with the exception of  
450 NOU) and only Spanish individuals associated with the Germanic invasions, especially  
451 individuals associated with Visigoth or Carolingian archaeological remains, are suitable  
452 proxies for contemporary French ancestry (Table S2.3).

453 We also tested two-way models combining Mediaeval French with other ancient or present-  
454 day (non-French) populations (Table 1). We found that models fitting the WBR ancestry  
455 involve populations from the British Isles, Norway or Iceland ( $0.27 < P < 0.96$ ). Indeed, the  
456 proportion of ancestry derived from present-day English or English Romans as proxy sources  
457 exceeds 90% (standard error of 0.26 and 0.23, respectively) versus less than 10% from  
458 Mediaeval French. Moreover, we observed that two-way models involving Northwestern  
459 Europeans/Scandinavians and Mediaeval French fit the ancestry of the other present-day  
460 French (EBP, NOR and HAU) on the English Channel coast ( $P > 0.13$ , Table 1). However, the  
461 Scandinavian or Northwestern European contribution in these groups is smaller than that found  
462 in WBR. For EBP, NOR, HAU, GRA, CEN and SLO, we noted that two-way models including  
463 a central European proxy source - such as early Mediaeval individuals from Germany or  
464 modern Hungarians - also fit the data with estimated contributions as large as 0.70 and 0.63 to  
465 NOR and EBP, respectively. However, they do not represent a good fit for the ancestry of WBR  
466 or NOU, in agreement with the low proportions of Germany-related ancestry previously  
467 observed with the supervised clustering analysis (Fig. 3b). In sum, *qpAdm* modelling shows  
468 relative population continuity between the Mediaeval period and present-day times in  
469 Northwestern France while emphasising a north/south Loire split with respect to the genetic  
470 contribution from Northwestern or Mediterranean Europe, respectively. Although genetic  
471 ancestry from countries in Northwestern European is found across the multiple populations  
472 dwelling north to the river Loire, WBR is the population in which such ancestry is found at its  
473 maximum.

#### 474 *Large genetic affinities between Brittany and ancient Bell Beakers*

475 Using a three-way admixture model, we then estimated the ancestry contributions from the  
476 three major ancient populations that spread across Europe - western hunter-gatherers (WHG),  
477 early farmers (EF) and steppe pastoralists (SP) - to present-day French and confirmed the  
478 aforementioned results (Fig. 4b and Table S2.4). SP ancestry proportion for regions bordering  
479 the Channel (HAU, NOR, EBP and WBR) varies from 42% to 46% versus less than 40% among  
480 CEN, SLO, NOU and GRA, and reaches its maximum in WBR where it is similar, if not larger  
481 than EF ancestry ( $46\% \pm 2.1\%$  and  $43.6\% \pm 2\%$ , respectively, Table S2.4). Consistently,  
482 significant negative values (Z-score  $< -4$ , Table S2.5) for  $f_4$  statistics of the form  $f_4(\text{Mbuti},$   
483 *Russia\_EBA\_Yamnaya\_Samara; WBR, other modern French*) revealed increased allele sharing  
484 between Early Bronze Age Yamnaya pastoralists from the Eurasian steppe and WBR relative  
485 to other present-day French samples. In agreement with these elevated levels of steppe-like  
486 ancestry found in WBR, the results of the outgroup  $f_3$ -statistics of the form  $f_3(\text{Mbuti}; \text{Bell}$   
487 *Beaker, present-day Europeans)* and the  $f_4$ -statistics of the form  $f_4(\text{Mbuti}, \text{Bell Beaker}; \text{WBR},$   
488 *other modern French)* show that Bell Beaker-associated individuals from Northwestern Europe  
489 - who are reported to carry large amounts of steppe-related ancestry - share large levels of drift  
490 and significantly increased allele sharing (Z-score  $< -3$ ) with WBR relatively to other present-  
491 day French samples (Fig. 4c and Fig. S4.2).  $f_4$  statistics of the form  $f_4(\text{Mbuti}, \text{Western Hunter-}$   
492 *gatherer; WBR, other modern French)* were mostly not significant (except when the other  
493 present-day French was either NOU or GRA, see Table S2.5), which allow us to exclude the  
494 possibility that the genetic affinities between WBR and ancient Bell-Beaker-associated  
495 individuals could be caused by a significantly increased WHG ancestry uniquely in WBR.

496 Altogether, these results indicate that the largest contribution of steppe-related ancestry in  
497 present-day France is found across the regions located north to the Loire River, and that WBR  
498 shares similar levels of steppe ancestry only with other populations living along the  
499 northwestern shores of the European continent (e.g., Ireland, Scotland, Orkney Islands, Iceland  
500 and Norway).

## 501 Discussion

502 By exploring the whole genomes of present-day individuals originating from Northwestern  
503 France in comparison to those from neighbouring French and European populations, we  
504 provide novel insights into the demographic events shaping the genetic makeup of the  
505 Northwestern edges of the European landmass.

506 First, we found that population structure in the northern part of France is accompanied with  
507 variation in genetic affinities with Northwestern versus Southwestern Europeans. In particular,  
508 observations based on supervised admixture analysis,  $f_3$ -outgroup statistics and pairwise  $F_{ST}$   
509 values consistently attest connections between Western Brittany, and Western Great Britain  
510 (e.g., Wales and Cornwall) and Ireland (Fig. 3). These findings confirm previous reports of  
511 strong genetic affinities between Brittany and Ireland relative to the general population of Great  
512 Britain (44). They were further supported by haplotype-based methods, which are more  
513 powerful than allele frequency-based methods to capture differential contributions from closely  
514 related populations (30,51). Indeed, by inferring ancestry profiles from a set of surrogate  
515 sources with GLOBETROTTER, we highlighted the ancestry contribution from Irish  
516 populations into present-day Bretons (~24%) and found relatively smaller contributions from  
517 Wales or Cornwall (~9- and ~3-fold, respectively). Importantly, we detected some Irish  
518 ancestry across all the French regions we surveyed, leading us to hypothesise a long history of  
519 shared ancestry likely on the basis of the genetic makeup of the Celtic (Iron-Age) Gaul. The  
520 ancestry contributions of Wales and Cornwall exclusively found in Brittany, albeit very limited,  
521 are likely associated with more recent migrations. The importance of ancient migrations  
522 between the British Isles and Northwestern France has been previously proposed based on  
523 ubiquitous haplotype sharing between samples from France and the British Isles, especially  
524 samples from Western Great Britain and Northern Ireland(5). Such results fit with the reported  
525 higher frequencies of mutations associated with cystic fibrosis, hemochromatosis and lactase  
526 persistence shared between Brittany and Ireland(44,52,53). In parallel, our observations reveal  
527 larger genetic affinities between populations from Northern France and present-day individuals  
528 from Germany (Fig. 3). As for present-day French populations located south to the river Loire,  
529 genetic proximity is observed with contemporary Spanish, and signals of shared ancestry with  
530 the Basques. Basque people have recently been described as a typical Iberian Iron Age  
531 population whose ancestry was not influenced by later admixture into Iberia(54). These results  
532 are compatible with a scenario where Atlantic France south of the Loire shares the Iron Age  
533 legacy of the Basques, while it diverges from the Basques likely due to higher levels of gene  
534 flow associated with later incoming migrations (e.g., Germanic invasions) or simply through  
535 isolation by distance from other regions to the north and to the east.

536 Considering the relative ancestry contributions from ancient populations prior to 2000 BCE  
537 that spread across Europe, we provided evidence for differential distribution of steppe vs. Early  
538 Neolithic ancestry between the two sides of the Loire River, with Neolithic ancestry being more  
539 prevalent south of the river. These findings likely explain the shared ancestry between present-  
540 day Atlantic French located south of the Loire River (such as *Nouvelle-Aquitaine*) and the  
541 Neolithic-enriched Basque population. Similarly, the relatively high proportions of steppe  
542 ancestry found north to the Loire River and along the coast of the English Channel (Fig. 4b and  
543 Table S2.5) - and in particular in Brittany - might explain the genetic affinities observed with  
544 Ireland and the Western Great Britain (Fig. 3). Present-day Irish exhibit a strong signal of  
545 continuity with the geographically close Early Bronze Age individuals carrying high levels of  
546 steppe ancestry ( $\sim 39 \pm 8\%$ ) and among whom was found the earliest presence of the  
547 hemochromatosis mutation(55). In Ireland and in the rest of the British Isles, the introduction  
548 of steppe ancestry, which led to a considerable turnover of the contemporaneous genetic  
549 makeup, has been recently linked to the migration of individuals associated with the Bell  
550 Beaker complex from Northern/Central Europe(18,55). The lack of human ancient DNA from  
551 northern France - dating from the period between Copper Age and Early Iron Age - has  
552 hampered our understanding of such genetic turnover across the northern coast of France.  
553 Given (i) the elevated levels of steppe ancestry found among present-day French located along  
554 the English Channel coast and (ii) the high degree of allele sharing observed between present-  
555 day individuals from Brittany and Bell-Beakers-associated individuals carrying high levels of  
556 steppe ancestry (Fig. 4), we hypothesise that a similar degree of turnover has reached northern  
557 France and Brittany after the arrival of steppe ancestry. Previously reported Late Iron Age  
558 individuals from the region of Normandy were found to carry considerable levels of  
559 mitochondrial steppe ancestry and strong affinities with Bronze Age samples from the British  
560 Isles(19), suggesting extensive gene flow across the English Channel during the Bronze Age.  
561 This hypothesis is supported by metalwork-based archaeological evidence dating from the  
562 Middle Bronze Age, which points to the existence of a British Channel metalworking core  
563 area(56). Indeed, metal-based relationships between Ireland and Brittany may have started  
564 earlier. In Ireland, Bell Beaker pottery is closely associated with the introduction of copper  
565 metallurgy  $\sim 2400$  BC. However, while Irish Bell Beaker culture shows strong influence from  
566 Britain, the introduction of metalwork appears to have occurred through Atlantic Europe(17).  
567 Metalwork identified in Brittany from the Chalcolithic and Early Bronze Age suggests  
568 exchanges of metals such as copper and tin between the regions of Brittany, Ireland(57) and  
569 Cornwall(17). Archaeological evidence exists for extensive connections between Brittany and  
570 Ireland/Western Britain dating as early as 4500 BCE and related to the phenomenon of  
571 Megalithic monument construction. However, genetic data presented in this study do not  
572 support a scenario where the close relationship between Brittany and Ireland/Western Britain  
573 can be simply explained by a larger sharing of alleles pre-dating the arrival of the steppe  
574 ancestry. Samples associated with the Megalithic period from the British Isles exhibit similar  
575 levels of allele sharing with all the present-day samples from France (Table S2.6), in contrast  
576 with increased allele sharing with Corded-Ware- and steppe-enriched Bell Beakers-associated  
577 samples uniquely found in Brittany (Fig. S4.2 and Table S2.7). Furthermore, we found no  
578 differences in genetic affinities between present-day French and the ancient samples related to

579 the two Neolithic waves - the Mediterranean and the Danube waves - that could alternatively  
580 explain both the differences between north and south of the river Loire and the close  
581 relationship between Brittany and Ireland (Table S2.8).

582 In contrast with the pattern found for the distribution of Neolithic and steppe ancestries, we  
583 found that fractions of western hunter gatherer (WHG) ancestry do not differ across the two  
584 margins of the river but instead tend to decrease inland (Fig. 4b, Table S2.4). Larger WHG  
585 proportions in present-day coastal French populations might reflect a longer coexistence  
586 between late Mesolithic populations and newly incoming farmers due to the significant  
587 exploitation of marine resources by the former communities(9), as it seems to have been the  
588 case in Brittany. However, a denser sampling of present-day populations from central and  
589 eastern France is required to test this hypothesis. Together our results point to a scenario where  
590 the migration of people associated with the Bell Beaker complex culture from North/Central  
591 Europe considerably influenced the genetic makeup of Northwestern France during the Bronze  
592 Age by introducing steppe-related ancestry all along the French coast of the English Channel.  
593 However, whether this occurred through direct influence of the Bell Beaker incomers from the  
594 east or through extensive contacts with the British Isles is an important question that can only  
595 be addressed through the study of human ancient DNA from Northern France from the Copper  
596 to the Early Iron Age. Importantly, Brittany is the place where the genetic legacy associated  
597 with the introduction of steppe ancestry is currently the strongest. This likely indicates relative  
598 isolation from later continental migrations, which seem to have increased Neolithic ancestry  
599 eastwards. Our admixture modelling approach lends support to this view by showing a lack of  
600 genetic affinities between Central European and Brittany, as one- or two-way models involving  
601 such populations (e.g. Hungarians, Germans) do not fit the data for Western Brittany (Table 1).  
602 This contrasts with the results for all the remaining present-day French populations. The  
603 introduction of this Central European component, probably less rich in steppe ancestry, might  
604 reflect the influence of Germanic peoples in present-day France during the first millennium CE  
605 similarly to what has recently been reported in England(58). Nevertheless, we do not exclude  
606 the possibility that the shift towards a Central European component, which we observed across  
607 multiple analyses with the “merged-modern dataset” (Fig. 3), could be explained by earlier  
608 migrations.

609 We found Mediaeval samples from Western France to carry generally less steppe ancestry than  
610 their geographical close present-day populations (Fig. 4b). This is consistent with a model in  
611 which the introduction of steppe ancestry in Northern French ~2000 BCE remained restricted  
612 to the coastal or near coastal regions for centuries. Nevertheless, we recall that Early Mediaeval  
613 samples display substantial genetic heterogeneity as two samples carry contrasting proportions  
614 of steppe- vs. Neolithic-ancestry (fra016 and fra017) and one sample (fra009) did not fit the  
615 genetic diversity of present-day France. Instead, this sample seems to originate from North  
616 Africa and provides evidence for long-distance migration between the northern part of France  
617 and northern Africa, as early as the Early Mediaeval period (~5-6 century CE). Finally, we  
618 found a lack of genetic continuity between Mediaeval French and Iberian populations dating  
619 from the first millennium BCE ( $P < 0.05$ , results not shown). Signals of genetic continuity were  
620 only found with Iberian individuals archaeologically associated with Germanic invasions,



621 suggesting that until late Antiquity and Early Mediaeval Period (3th-10th century CE) French  
622 and Iberians might have kept low levels of gene flow.

623 Focusing on the genetic structure of the present-day populations from Northwestern France,  
624 global clustering patterns based on fineSTRUCTURE overlap with the distribution of surnames  
625 as well as the linguistic boundaries between varieties of Breton, which are spoken in the  
626 westernmost part of the Peninsula of Brittany, and Gallo-Romance varieties, spoken across the  
627 eastern part of the peninsula and the whole neighbouring region of *Pays-de-la-Loire* (Fig. 1).  
628 The role of linguistic relationships in the worldwide patterns of structure of human populations  
629 has long been recognized(59). Within-country studies, such as the one we present here, have  
630 not only validated previous claims but also showed that such a relationship holds at local  
631 geographical scales, as it has recently been shown in Northern Spain and in Great Britain(3,5).  
632 While we found that Western Brittany forms a distinct cluster based on haplotype similarity  
633 and rare allele sharing, it is worth noting that genetic differentiation increases from the  
634 westernmost tip of the peninsula of Brittany southwards, and especially south of the Loire  
635 River. The differentiation between Western Brittany and regions south of the Loire River is  
636 larger than that found along the west-east axis (between the *département* of *Finistère* and that  
637 of *Sarthe*) north of the Loire River, despite similar geographic distances (~350 km). The role  
638 of the Loire River as a geographical barrier to the movement of people has been recently  
639 proposed due to the overlap between genetic cluster boundaries, inferred across the whole  
640 country, and the natural occurrence of the river (31). In the Netherlands, rivers have also been  
641 shown to locally restrict gene flow(60), but the general role of water bodies in promoting or  
642 impeding human movements remains unclear. A good understanding of the role of the Loire  
643 River on the local patterns of migration requires associating the river's features with genetic  
644 differentiation measures along its full extension, which, in our case, is not possible due to the  
645 absence of samples along its upstream drainage area. Altogether, the structure patterns observed  
646 within Northwestern France contrast with the simple vision that genetic differentiation  
647 increases with the geographical distance(43).

648 At finer scales, present-day data revealed extensive population structure across Brittany and  
649 *Pays-de-la-Loire*, despite the overall low levels of differentiation ( $F_{ST} = 0.00043$ ). Within  
650 Brittany, at intermediate resolution levels, clustering patterns largely overlap with watercourses  
651 (see SOM for further details). Furthermore, low population differentiation and increased IBD  
652 sharing between the cluster "Vannes" and other clusters eastwards on one side, and between  
653 the westernmost clusters "Léon" and "Cornouaille" on the other side, suggest a dichotomy  
654 between northwest and southeast. Such division is in agreement with the accruing geo-  
655 linguistic evidence for a bipartition of Breton varieties into two groups - the Breton varieties  
656 spoken in the northwest and those spoken in the southeast of the peninsula of Brittany, whose  
657 distributions coincide with the ranges occupied by the Gaulish (Celtic) *Ossimii* and *Veneti*,  
658 respectively(61). Noteworthy, the cluster "Bretagne-centre" roughly overlaps with the border  
659 of the *Ossimii* and *Veneti* territories, suggesting relative genetic homogeneity likely due to  
660 extensive gene flow at this border. Such homogeneity is also recognizable at the level of  
661 linguistic features (Fig. S.1.11, Fig. S1.12, Fig. S5; see SOM for details). Finally, we also found  
662 genetic clusters with no apparent geographical barrier at their border, such as "Vannes" and  
663 "Guérande". Overall, the genetic structure observed within Brittany appears consistent with a

664 complex scenario of interaction between geographical, cultural and likely economic factors  
665 influencing population connectivity. Located south to the Loire River, the region of *Mauges* -  
666 which exhibits the highest density of clusters - is situated at the southeastern tip of the  
667 Armorican Massif and encompasses hedged farmlands crossed by steep valleys. We  
668 hypothesise that this landscape contributed to relative isolation and increased genetic drift and  
669 lasted until about 300 years ago, as estimated in the dataset (assuming a generation time of 29  
670 years/generation, Fig. S1.15). Such a scenario could explain the increase in haplotype sharing  
671 for long, and likely recent, chromosomal segments (Fig. S1.9). Other population-specific  
672 features, such as recent ancestry caused by inbreeding, could equally explain such strong  
673 clustering patterns. However, levels of relatedness were not found significantly larger than in  
674 other clusters (Fig. S1.2-S1.4). This ultra-fine-scale structure with geographically restricted  
675 clusters resembles that observed in the region of Galicia, Spain(3) and emphasises the need for  
676 whole-genome sequencing studies on local populations in order to better understand the  
677 distribution of rare, and likely more deleterious, variants across space(1).

678 In conclusion, the patterns of genetic structure observed across Brittany and the downstream  
679 Loire basin mainly reflect the likely combined effect of linguistics and geographic features.  
680 This lends further support to the idea that local population differentiation exists, as it has been  
681 shown within other countries (3,5), and can be detected at geographical distances as small as a  
682 few tens of kilometres even in the absence of major geographical barriers. Within this structured  
683 genetic landscape, Brittany reveals a history of isolation from the rest of France together with  
684 a strong legacy of the important genetic changes (i.e. the introduction of steppe ancestry) that  
685 followed the arrival, in Northwestern Europe, of people associated with the Bell Beaker  
686 complex from north-central Europe ~2500 BCE. A similar scenario has been proposed for the  
687 present-day Celtic populations in the western part of the British Isles - the Welsh and Irish -  
688 who display elevated haplotype sharing with Bronze Age samples(55) and strong genetic  
689 affinities with pre-Anglo-Saxon samples from Britain(62). Our results imply that: 1) a scenario  
690 in which Mediaeval population movements along the English Channel and the Atlantic façade,  
691 such as those related to incoming Western Britons in Brittany during the 4-6th century CE or  
692 the Viking incursions ~8-9th century CE, are unlikely to be the main explanation for the close  
693 genetic between the northwestern edges of the European continent; and 2) a long-history of  
694 shared ancestry between Brittany and Ireland/Western Britain followed by their relative  
695 isolation explains the sharing of disease-related alleles such as those associated with  
696 hemochromatosis, cystic fibrosis and lactase persistence.

## 697 **Methods**

### 698 France administrative division overview

699 This study relies on a dense sampling of the geographical region of western France, which  
700 crosses multiple administrative subdivisions of the territory. Among these subdivisions are the  
701 1) regions - the largest administrative units - which are subdivided into 2) *départements*. A  
702 *département* is subdivided into 3) *arrondissements*, which at the smallest scale are divided into  
703 4) town centers. Given the specificity of the administrative system we kept the French name  
704 for the *département* and *arrondissement* along the manuscript.

705 Cohort description

706 Project PREGO (“Population de référence du Grand Ouest”, [www.vacarme-project.org](http://www.vacarme-project.org))  
707 collected the DNA of 5,707 healthy persons originating from western France (*Pays de la Loire*  
708 and Brittany regions). Individuals were recruited during 295 blood drives organised by the  
709 French Blood Service (EFS in French) carried out between February 2014 and March 2017,  
710 with a mean of 19 donors per blood drive. Blood drives were spatially and temporally sampled  
711 in order to obtain a coverage as homogeneous as possible of the nine *départements* included in  
712 the study. Priority was given to blood drives taking place in rural areas. Participants should be  
713 native of western France. Individuals’ birthplace was assessed by the place of birth of the four  
714 grandparents. Only individuals whose four grandparents were born in western France and  
715 preferably within a radius of 30 km were included in this study. From the 3,234 individuals  
716 included in the present study, 25%, 50% and 75% have their grandparents born 3.25, 6.38 and  
717 12.33 kms from each other, respectively.

718 Venous blood samples (6ml) were collected from recruited individuals by venipuncture into  
719 Vacutainer tubes. Participants filled out a questionnaire providing grandparents’, parents’ and  
720 their own birthplaces, residence, age, sex and information about previous participation in the  
721 study (of the individual itself or another member of the family). Neither phenotypic nor clinical  
722 data was collected in the present study. Declaration and ethical approval process was achieved  
723 in 2013 and involved the Ministry of Research, the Committee of protection of persons (*Comité*  
724 *de Protection des Personnes*, CPP in French), the Advisory Committee on Information  
725 Processing for Health Research (CC- TIRS in French), and the National Commission on  
726 Informatics and Liberty (CNIL in French). Participants signed a written informed consent for  
727 participation in the study, inclusion in bio-resource and personal data processing.

728 The FranceGenRef study aims to describe patterns of population diversity across metropolitan  
729 France at the beginning of the 20th century. Thus, individuals were sampled based on the  
730 birthplace of their grandparents, whose distance should not exceed 30 kilometres.  
731 FranceGenRef includes a total of 862 individuals satisfying the aforementioned criteria and  
732 sampled under the scope of three different studies: 50 blood donors sampled in the *département*  
733 of *Finistère* (FIN, Fig. 1b), 354 blood donors from the PREGO cohort ([www.vacarme-](http://www.vacarme-project.org)  
734 [project.org](http://www.vacarme-project.org)) with origin in the three other *départements* of the region of Brittany - *Côtes*  
735 *d'Armor* (COT), *Ille-et-Vilaine* (ILL) and *Morbihan* (MOR) - and in the five *départements* of  
736 the region of *Pays-de-la-Loire* - *Loire-Atlantique* (LOI), *Maine-et-Loire* (MAI), *Mayenne*  
737 (MAY), *Sarthe* (SAR) and *Vendée* (VEN) -, and finally 458 individuals from the GAZEL  
738 cohort ([www.gazel.inserm.fr/en](http://www.gazel.inserm.fr/en))(63,64), among which are individuals from five other regions  
739 of France: Normandie, Hauts-de-France, Grand East, Centre-Val de Loire and Nouvelle-  
740 Aquitaine. All individuals signed informed consent for genetic studies at the time they were  
741 enrolled for the blood collection. DNA samples from GAZEL samples were extracted at the  
742 CEPH Biobank on an automated system either Autopure (Qiagen) or Chemagic Prime  
743 (PerkinElmer) using respectively the salting out method or magnetic beads and were quantified  
744 using fluorimetry (Quant-iT DNA Assay kit, Broad Range, Thermo Fisher Scientific).

745 Genotyping, whole-genome sequencing and quality control (QC)

746 *SNP array genotype processing*- Under the scope of PREGO, out of 5,707 collected samples,  
747 3,385 were genotyped on the Axiom™ Precision Medicine Research Array (~ 920,000  
748 markers, ThermoFisher). Standard QC was performed using SNPolisher software  
749 (<http://tools.thermofisher.com>) and SNPs not passing the QC report were removed according  
750 to the manufacturer's instructions. SNPs with a missing rate >5%, minor allele frequency <10%  
751 and not in Hardy-Weinberg Equilibrium ( $p < 10^{-6}$ ) were excluded from the dataset resulting in  
752 a total of 210,171 SNPs. Relatedness was assessed via the PI\_HAT statistics, which provides  
753 an estimation of the proportion of the genome shared by two pairs of individuals (*i.e.* identity-  
754 by-descent, IBD). PI\_HAT statistics was computed using PLINK (vs.1.9). After removing  
755 related individuals with a PI\_HAT  $\geq 0.08$ , there were 3,234 samples left for analysis.  
756 Genotyping was conducted in three batches of 971, 1266, 997 individuals, respectively. To  
757 investigate potential batch effects, we employed linear regression using a batch indicator  
758 variable on the first five principal components. We found no significant association at the  
759 significance level of 0.05.

760 *Whole-genome sequencing and variant calling* - Whole-genome sequencing of 856  
761 individuals was performed at CNRGH (Evry, France) using their standard workflow  
762 ([www.cnrgh.fr](http://www.cnrgh.fr)). All the samples were sequenced at high coverage (average coverage 30x).  
763 Read processing was performed with GATK 3.8 following the “best practices” NGS pipeline  
764 recommendations of the Broad Institute (<https://software.broadinstitute.org/gatk/best-practices>). Reads were mapped on the GRCh37 reference genome using *bwa-mem*, duplicates  
765 were removed and reads were then realigned and recalibrated according to GATK best  
766 practices. Variant calling was performed with GenotypeGVCF. GVCF files were then merged  
767 using GATK CombineGVCF function, recalibrated and annotated with SnpEff (65) and the  
768 gnomAD database (<https://gnomad.broadinstitute.org/>). The resulting GVCF files were filtered  
769 out in order to only keep SNPs with high mapping quality (MQ>30). Furthermore, only SNPs  
770 in Hardy-Weinberg equilibrium (HWE,  $p\text{-value} = 10^{-5}$ ) and less than 10% of missing data were  
771 kept for analysis.

### 773 Merging with publicly available datasets

774 *Publicly available datasets of western Europeans* - To investigate the relationship of modern  
775 individuals from the north part of France and other European populations we merged the WGS  
776 dataset with three available genome-wide datasets encompassing a large number of western  
777 European samples: 1) the EGAD00000000120 from the The International Multiple Sclerosis  
778 Genetics Consortium and the Wellcome Trust Case Control Consortium 2 (referred to hereafter  
779 as the MS dataset)(42), 2) the EGAD00010000124 from the Genetic Analysis of Psoriasis  
780 Consortium & the Wellcome Trust Case Control Consortium 2 (referred to hereafter as PS  
781 dataset)(41), and 3) the EGAD00010000632 from the Peopling of the British Isles (referred to  
782 hereafter as POBI,(5)). In the MS and PS datasets samples were genotyped on the Human670-  
783 QuadCustom SNPchip encompassing 580,030 autosomal sites and the datasets include 11,376  
784 and 2,622 individuals, respectively. MS dataset includes samples from: Australia, Belgium,  
785 Denmark, Germany, Finland, France, Italy, New Zealand, Northern Ireland, Norway, Poland,  
786 Spain, Sweden, US and UK, whereas the PS dataset includes samples from UK and Ireland. In  
787 the POBI dataset, 2,912 individuals from the UK were genotyped on the Human1-2M-

788 DuoCustom SNPchip encompassing 1,115,428 autosomal sites. For the three datasets, original  
789 genotype likelihood files (.gen) were converted into plink format files with gtool (vs. 0.7.5).  
790 Only individuals and sites passing quality criteria thresholds (provided with the datasets) in the  
791 original studies were kept. Genotypes were called using a probability cut-off of 0.90. Sites  
792 containing alleles in the negative strand were flipped according to the corresponding strand file  
793 <https://www.well.ox.ac.uk/~wrayner/strand/> using PLINK vs.1.9. First, we checked whether  
794 the alleles were in the illumina TOP configuration, as required to flip based on the strand file.  
795 Sites not found in TOP configuration were removed from the datasets. We used the liftOver  
796 tool (<https://genome.ucsc.edu/cgi-bin/hgLiftOver>) to convert the physical coordinates to hg19  
797 as they were originally in hg18 in the MS, PS and POBI datasets. We merged the samples from  
798 Belgium, Denmark, Germany, Finland, France, Italy, Northern Ireland, Norway, Poland, Spain,  
799 Sweden and UK with the Irish samples from the PS dataset. In a second step, we merged this  
800 dataset with a subset (to keep the sample size computationally tractable) of the POBI dataset  
801 comprising two samples from Wales (Dyfed and Gwynedd), the sample from Cornwall and two  
802 samples from Norfolk and Kent (eastern UK). Finally, we merged the dataset above with  
803 seventy samples from the available Human Genome Diversity Project dataset  
804 (<https://www.hagsc.org/hgdp/files.html>) genotyped on the Illumina 650Y SNPchip array and  
805 originated from Sardinia, the Basque Country, Orkney Islands and the Mbuti (to use as an  
806 outgroup). Chromosomal coordinates for the HGDP dataset were lifted over as described  
807 above. From this merged dataset we filtered out sites not in Hardy-Weinberg Equilibrium  
808 (HWE,  $p\text{-value} = 10^{-5}$ ), removed those falling into the HLA region (chr6:29,691,116-  
809 33,054,976) and removed all the multiallelic sites. The final dataset, hereafter referred to as  
810 “merged modern dataset”, encompassed 9704 samples and 433,940 SNPs.

811 *Human Origins Array and Viking datasets* - We merged the French WGS dataset with the  
812 Human Origins Array (HOA) dataset V42.4 ([https://reich.hms.harvard.edu/allen-ancient-dna-](https://reich.hms.harvard.edu/allen-ancient-dna-resource-aadr-downloadable-genotypes-present-day-and-ancient-dna-data)  
813 [resource-aadr-downloadable-genotypes-present-day-and-ancient-dna-data](https://reich.hms.harvard.edu/allen-ancient-dna-resource-aadr-downloadable-genotypes-present-day-and-ancient-dna-data)) encompassing  
814 3,589 ancient and 6,472 present-day individuals genotyped for 593,124 autosomal SNPs. From  
815 the original dataset we extracted European samples (Austria, Belgium, Czech\_Republic,  
816 Denmark, France, Germany, Great\_Britain, Greece, Hungary, Iceland, Ireland, Italy,  
817 Luxembourg, Netherlands, Norway, Poland, Portugal, Russia, Spain, Sweden, Switzerland,  
818 Turkey) with PASS tag under the “Assessment” field in the annotation file. From this subset  
819 we removed samples whose individuals’ ID contain *Ignore* and with less than 50,000 genotypes  
820 called to avoid potential bias. This dataset was then merged with 405 ancient DNA samples  
821 belonging to Vikings from the study: “Population Genomics of the Viking world”(49) and  
822 previously called for HOA set of SNPs. This dataset is referred to hereafter as “merged ancient  
823 dataset”. Mbuti samples (HGDP-CEPH, Human Genome Diversity Project-Centre d’Etude du  
824 polymorphisme Humain - [https://cephb.fr/en/hgdp\\_panel.php](https://cephb.fr/en/hgdp_panel.php)) from the HOA were also  
825 extracted to compute  $f$ -statistics (see below).

## 826 ChromoPainter and fineSTRUCTURE

827 PREGO’s SNP-array dataset (post-QC) was phased with SHAPEIT v2.r790 (66) using the  
828 genetic map build 37 provided with the software and no reference panel. Phased genotype files  
829 were converted into CHROMOPAINTER(45) format using the impute2 chromopainter2.pl

830 script. Switch (global  $N_e$ ) and emission rates ( $\mu$ ) were estimated with CHROMOPAINTER  
831 version 2 using data on chromosomes 1, 4, 10 and 15 from 330 individuals (around 10% of the  
832 total sample). The estimated parameters were then used to run CHROMOPAINTER on the full  
833 data. A Principal Component Analysis (PCA) on the coancestry matrix (chunkcounts output)  
834 was performed in R. Coancestry matrix estimates the proportion of the genome of each  
835 individual that is most closely related to every other individual in the matrix. In particular,  
836 chunkcounts matrix is based on the number of copied haplotype chunks. We assigned  
837 individuals to clusters using the model-based approach implemented in fineSTRUCTURE  
838 version 2.1.3. We ran fineSTRUCTURE version 2.1.3 on the coancestry matrix with  
839 10,000,000 burn-in iterations and 1,000,000 MCMC iterations, from which every 10,000th  
840 iteration was recorded. We kept the default values for the other options. The tree was built using  
841 100,000 tree comparisons and 10,000,000 additional optimization steps. MCMC convergence  
842 was assessed by comparing the individual assignment to clusters in a second independent chain.  
843 Confidence measures of cluster assignment and visualisation of coancestry matrix were  
844 performed with the help of the R library FinestructureLibrary provided with the software. The  
845 tree provided by fineSTRUCTURE software is based on posterior probabilities of the  
846 population configuration (ie. individual partition across clusters), which is highly dependent on  
847 the sample sizes and does not reflect differences between pairs of clusters(32,67). Therefore,  
848 as an alternative we computed a tree based on the total variation distance (TVD) as firstly  
849 described by Kerminen and colleagues(32). TVD measures the distance between the clusters  
850 and it is not affected by differences in sample sizes. TVD values are computed from the copying  
851 profiles of all individuals, estimated with CHROMOPAINTER, and the cluster assignment  
852 inferred with fineSTRUCTURE as described in(32). It results in a final symmetrical matrix  
853 with as many rows and columns as the number of clusters inferred ( $K$ ), where each entry  
854 represents the average closest ancestry contribution in cluster  $k$  coming from other clusters. We  
855 computed the TVD matrix on the final fineSTRUCTURE partition ( $k \leq 154$ , finest level of FS-  
856 tree) and the TVD-tree was obtained using complete linkage hierarchical clustering.

857 We assessed the performance of the two tree building approaches on the PREGO dataset. The  
858 performance was measured by comparing cluster assignment confidence as computed in Leslie  
859 *et al.*(5). As expected, cluster assignment confidence decreases with increasing number of  
860 clusters (Fig. S1.6.). Moreover, we found that for the same  $k$  the FS-tree shows lower cluster  
861 assignment confidence than the TVD-based tree, confirming the better performance of the  
862 latter. To visualise the relationship between the clusters (Fig. 1d), we arbitrarily chose  $k=39$   
863 because it provides a large enough number of clusters to access fine-scale structure while  
864 keeping cluster assignment confidence  $>90\%$  (Fig. S1.6). At this level of the tree, clusters  
865 containing 1-5 individuals were merged into the closest cluster with  $\geq 31$  individuals or  
866 removed if the closest cluster included itself  $<4$  individuals. This approach resulted in a TVD-  
867 based tree of 18 clusters performing better than FS tree, which achieves similar values of cluster  
868 assignment confidence for only 12 clusters. Finally, we tested whether inferred clusters capture  
869 significant differences in ancestry by following the approach of (5). To do so, we randomly  
870 reassigned the individuals to clusters, maintaining the cluster sizes, and computed the p-value  
871 of the population configurations produced by the  $k=18$ . The TVD-based tree was less likely  
872 than a random distribution of individuals across pairs of clusters. We performed 1000

873 permutations to obtain p-values, which were computed as the number of permutations where  
874 random assignment resulted in a higher value of TVD between any pair of clusters and the total  
875 number of permutations. For the level of  $k=18$ , p-values were  $< 0.001$  for all pairs of clusters.  
876 The tree shown in Fig. 1d was built using the *clustree* and *ggtree* packages of R-statistical  
877 software.

878 *Assessing sampling effect on fineSTRUCTURE clustering* - We investigated whether the  
879 sampling scheme carried out in this study, which densely selects individuals representing every  
880 location over four generations, increases the probability of having recently related individuals.  
881 This recent ancestry may affect clustering patterns. To check the effect of recent ancestry on  
882 the fineSTRUCTURE clusters we computed a relatedness measure based on identity by state  
883 (IBS) within clusters, for  $k=3$ , 18 and 78 (only for those clusters with  $n > 10$  at the finest scale  
884 level  $k=154$ ), and compared it with the overall distribution. With the exception of  $k=154$ , where  
885 six clusters have a median IBS-statistics larger than the 75% of overall IBD distribution, across  
886 the other values of  $k$ , most of the clusters do not show increased relatedness (Fig S1.2-S1.4)  
887 and therefore, we conclude that recent ancestry is not driving the results.

#### 888 Surname analysis

889 The list of surnames associated with birth registration data and occurring in two periods (period  
890 one: 1891-1915 and period two: 1816-1940) were retrieved from the French Institute for  
891 Statistics and Economic Studies, the INSEE (<https://insee.fr>). Surname lists are available at the  
892 town level. To analyse the distribution of surnames we proceed as follows. 1) For each town,  
893 we chose the surnames present in the two periods and registered at least four times, *ie.* given to  
894 four newborns. Such an approach removes very rare names often associated with spelling errors  
895 in the registration and rare emigrants from other regions of France or elsewhere. 2) summed  
896 the number of surname occurrences over the two periods at the *arrondissement* level. There are  
897 35 *arrondissements* within the ten selected *départements*. 3) We computed the Arccos distance  
898 (68) between the 35 *arrondissements* and 4) constructed a consensus tree based on 1000  
899 bootstrapped distance matrices obtained by the Neighbour Joining method. Finally, we built a  
900 map linking the *arrondissements* in a nested way according to the bootstrap values of the NJ  
901 tree. The threshold for grouping *arrondissements* was 90% bootstrap robustness while the  
902 threshold for higher order grouping is 85%. There are various possible distances that can be  
903 computed from surname data (eg. Nei, Hedrick, Lasker, Euclidian). However, using different  
904 distances gives similar results (data not shown).

905 Correlation between surname based Arccos distance and  $F_{st}$  was performed using Mantel  
906 distance matrix correlation test using Spearman rank correlation. The physical distance between  
907 *arrondissements* was done using partial correlation(69). Surname distribution diversity index  
908 were entropy and Barraï index. Let  $N$  be the population size in a geographical area and  $S$  the  
909 number of different surnames and  $p_i$  the probability of Surname  $i$ .

$$910 \text{.entropy} = \left[ - \sum_{i=1}^S p_i * \ln(p_i) \right]$$

911

#### 912 PCA analysis and $F_{st}$ computation

913 PCAs was carried out using the *smartpca* software from the EIGENSOFT package version 6.1.4  
914 (70).  $F_{ST}$  values were obtained by setting up the option *fsthprecision*: YES. Both analyses were

915 performed after pruning for linkage disequilibrium using a sliding window of 50 SNPs in steps  
916 of 5 SNPs and keeping those SNPs with  $r^2 < .50$  (Fig. 3a and Fig. S2.2). The regions previously  
917 reported as exhibiting long-range linkage-disequilibrium (71) were excluded before performing  
918 the PCAs.

#### 919 Runs of homozygosity (ROH), Identity by descent (IBD) and IBDNe estimations

920 Individuals' runs of homozygosity (ROH) and identity by descent (IBD) segments were  
921 calculated using RefinedIBD (version from 23rd December 2017) based on the PREGO dataset.  
922 Individuals' ROH were computed by summing the total length in ROH segments per individual  
923 and averaged across individuals within *départments* and *arrondissements*. We computed IBD  
924 sharing by counting the number of IBD segments shared between pairs of individuals assigned  
925 to the 18 clusters inferred by fineSTRUCTURE. This was done independently for IBD  
926 segments of length: 1-2 cM, 2-7 cM and longer than 7 cM.

927 We estimated the trajectories of effective population size with IBDNe(33) (version released on  
928 7th May 2018). IBD segments were identified with IBDseq (version r1206, with default  
929 settings). As suggested by Browning and Browning 2018 (72), we removed regions with excess  
930 of IBD to avoid potential bias, such as the Major Histocompatibility Complex (MHC) on  
931 chromosome 6 (chr6:26291527-33464061). We thus split chromosome 6 into two continuous  
932 parts. To evaluate the robustness of the effective population size trajectories across different  
933 IBD segment sizes, we varied the *mincm* parameter, which sets up the minimum length of IBD  
934 segments used by IBDNe. Value of *mincm* should be chosen considering SNP density on the  
935 SNP array.

#### 936 Rare variation analysis

937 We investigated allele sharing patterns using doubletons (alleles that are present in only two  
938 chromosomes or minor allele count MAC=2) and variants with MACs between 3 to 10  
939 computed from the WGS dataset encompassing 620 individuals from Northwestern France. We  
940 first randomly selected 1 million sites from each dataset and allele sharing matrices were  
941 computed by summing all the variants shared between pairs of chromosomes of different  
942 individuals from Brittany and *Pays-de-la-Loire*. We plotted the results as a heatmap and  
943 performed hierarchical clustering (*hclust* function in R with method="complete") to identify  
944 clusters of highly correlated allele sharing. The resulting tree was cut at multiple levels (k=2-  
945 10) and the proportion of individuals, within each *département*, assigned to the alternative  
946 clusters was plotted onto the map of Northwestern France. These analyses were performed  
947 using the R statistical package together with the following libraries: ComplexHeatmap, rgdal,  
948 sp, broom, ggplot2 and scatterpie.

#### 949 Supervised admixture analysis

950 The supervised clustering analysis was performed using ADMIXTURE vs1.3 software(73) on  
951 the WGS dataset including the 846 French samples used in the PCA. We assumed that modern  
952 French originate from three modern source populations: Spain, Germany and Ireland, which lie  
953 in the extremes of the distribution of modern French individuals in the PCA (Fig. 3a). Given  
954 that difference in sample sizes (see section *Publicly available datasets of western Europeans*)  
955 in the source populations we downsampled Germany and Ireland to 350 individuals. SNPs in



956 linkage disequilibrium were removed by following the recommended practises in the software  
957 manual, ie. PLINK option *--indep-pairwise 50 10 0.1*. Only sites with minimum genotype rates  
958 <10% were analysed.

### 959 Ancestry profiles with GLOBETROTTER

960 To further investigate the contribution of external populations to the genetic makeup of France  
961 we estimated ancestry contributions from their European neighbours using the statistical  
962 approach implemented in GLOBETROTTER software(45). This method identifies and  
963 describes recent (<4.5ky old) admixture events, by providing admixture times and proportions,  
964 explaining the haplotypic ancestry of a target population. Given that GLOBETROTTER infers  
965 admixture events from patterns of haplotype sharing it requires two input files: the “copy  
966 vectors” and “painting samples” generated by the CHROMOPAINTER. To obtain these files  
967 we ran CHROMOPAINTER following the author’s recommendations (section 8.2 “running  
968 ChromoPainterV2 with GLOBETROTTER”) on the phased “merged modern dataset”. The  
969 “copy vectors” files (\*.chunklengths.out) were combined using the scripts provided with the  
970 software package. To detect signals of admixture we first ran GLOBETROTTER with the  
971 option *null.ind: 1* and then computed the number of bootstraps providing a date of admixture  
972  $\geq 1$  and  $\leq 400$  generations. This step provides a *p-value* that can be interpreted as the  
973 evidence of “detectable admixture”. *P-values* were computed using 100 bootstraps. Confidence  
974 intervals for the inferred admixture times were estimated by running 100 additional bootstraps  
975 and with the option: *null.ind: 0*. We phased the “merged modern dataset” using SHAPEIT and  
976 no reference panel, in a similar manner to what was done with the PREGO dataset. To keep the  
977 analyses computationally tractable and due to imbalanced sample sizes, we randomly sampled  
978 350 individuals from countries with large sample sizes such as Italy, Germany, Norway and  
979 Belgium. To represent the haplotypic diversity of the UK and the Scandinavian Peninsula we  
980 only kept the samples from PoBI and Norway, respectively. A total of 3,598 samples were used  
981 to estimate ancestry contributions.

### 982 Admixture analysis: $f_3$ -, $f_4$ -statistics and *qpAdm* estimates

983 We computed the outgroup  $f_3$ -statistics of the form  $f_3(\text{Outgroup}; \text{Pop1}, \text{Pop2})$ , as implemented  
984 in Admixtools(46), using the Mbuti population as an outgroup. Pop1 and Pop2 were either a  
985 pairwise combination of a modern French and any other European population or a Bell Beaker  
986 sample and a present-day western European. The outgroup  $f_3$ -statistics quantifies the amount  
987 of shared history between pairs of populations in relation to an outgroup under a three-  
988 population tree. Provided that the outgroup is equally distant from Pop1 and Pop2, the outgroup  
989  $f_3$ -statistics represents the length of the branch from the outgroup to the internal node if no gene  
990 flow occurred between Pop1 and Pop2. To statistically assess the presence of admixture we  
991 computed  $f_4$ -statistics using the same software package. Admixture was also computed in order  
992 to test whether modern and ancient Mediaeval French show signals of admixture  $f_3$ -statistics  
993 by setting these populations as the *target*. Admixture  $f_3$ -statistics was computed using the  
994 option *inbreed: YES* in the case of the ancient Mediaeval as recommended by the authors of the  
995 program.

996 *qpAdm*, implemented in the Admixtools, is a computer program that assesses the goodness of  
997 fit of admixture models, involving a user-defined set of commonly known as “left” and “right”

998 populations, and estimates the proportion of admixture within a regression framework. The set  
999 of “left” populations encompasses the target population and the possible sources of admixture,  
1000 whereas the “right” populations include a set of populations distantly related to the “left”.  
1001 Importantly, the model assumes that the “right” populations are differentially related to the  
1002 “left” and exchange of genes between “left” and “right” must not have occurred after the event  
1003 of admixture, i.e. genetic drift shared between “left” and “right” derives from deep shared  
1004 evolutionary history. The method implemented in *qpAdm* is built on a matrix of  $f_4$ -statistics  
1005 computed across all possible combinations of “left” and “right” populations ( $f_4(\text{target}, \text{source};$   
1006  $R1, R2)$ , where R1 and R2 is any possible pair of “right” populations).  $P$ -values  $> 0.05$  together  
1007 with admixture proportions varying between 0-1 are indicative of a good fitting model.

1008 We performed the *qpAdm* analyses to estimate the contribution of the three major European  
1009 migrations(50,74) using western hunter-gatherers (WHG), Neolithic early-farmers (EF) and  
1010 Bronze Age steppe pastoralists (SP) as “left” populations together with the Mediaeval and  
1011 modern French populations. We grouped ancient individuals into WHG, EF and SP based on  
1012 the ancestry proportions inferred in Mathieson *et al.* (75). Only individuals with ancestry  
1013 proportions  $>.90$  were included into the three groups giving origin to sample sizes of 73, 42  
1014 and 17 for the EF, WHG and SP respectively. Admixture proportion estimates were computed  
1015 using 25 randomly selected modern individuals for the three genetic clusters inferred by  
1016 fineSTRUCTURE (WBR, EBP and SLO) and the remaining five regions of France (NOR,  
1017 HAU, GRA, CEN and NOU). With respect to the French Mediaeval samples we inferred  
1018 admixture proportions at the population (five Medieval French, the outlier was removed from  
1019 this computation) and individual level. The set of *right* populations used in these analyses was  
1020 the following: Mbuti, Han, AfontovaGora3, ElMiron, Karitiana, Kontenki14, MA1, Mota,  
1021 Papuan, Ust\_Ishim, Vestonice16, Villabruna, GoyetQ116-1, Morocco\_Iberomaurusian.

1022 In order to test for continuity of the genetic ancestry of Mediaeval and present-day French  
1023 populations we tested one-way models. In the case of Mediaeval French, the single source is a  
1024 neighbouring population (no post-Neolithic sample from France is available in the merged  
1025 dataset) of the same period or of the preceding one. In the case of present-day French, the single  
1026 source included the Mediaeval French and all the possible sources tested for the Mediaeval  
1027 French. Furthermore, we also tested two-way models where the genetic ancestry of modern  
1028 French is assumed to result from a mixture between the Mediaeval French and any other ancient  
1029 population from the neighbouring regions from Mediaeval to present-day times. Given the  
1030 larger availability of Iberian samples and the close geographical proximity with France we  
1031 included in the aforementioned analyses all the Iberian samples from the 5th century BCE to  
1032 the Mediaeval period (up to the 10th century CE). Only targets and source populations with a  
1033 sample size larger than two were used in these analyses.

1034 The early Neolithic period is characterised by the arrival of the first farmers in Western Europe  
1035 and the Early Bronze Age is characterised by the arrival of populations related to or carrying a  
1036 large proportion of their ancestry from pastoralist populations from the Eurasian steppes  
1037 (50,74). Therefore, we added Anatolia\_N and Russia\_EBA\_Yamnaya\_Samara to the set of  
1038 *right* populations: Mbuti, Han, AfontovaGora3, ElMiron, Karitiana, Kontenki14, MA1, Mota,  
1039 Papuan, Ust\_Ishim, Vestonice16, Villabruna, GoyetQ116-1, Morocco\_Iberomaurusian,  
1040 Anatolia\_N and Russia\_EBA\_Yamnaya\_Samara.

1041 aDNA Mediaeval samples

1042 We generated whole-genome data for six ancient individuals from three different  
1043 archaeological sites in western France, specifically from the region of *Pays-de-la-Loire*.  
1044 Samples were dated using radiocarbon methods and estimates vary from the 4th to the 11th  
1045 century CE. This interval corresponds to the early and High Mediaeval periods. Out of the six  
1046 ancient individuals, four were sampled south of the Loire river while two were sampled north  
1047 of the Loire. The archaeological excavations in Saint-Lupien, Rezé (south shore of the Loire)  
1048 took place between 2005 and 2016 and were led by the team of Mikaël Rouzic under the request  
1049 of the city of Rezé. The site located in Chaussé Saint-Pierre, Angers (north shore of the Loire),  
1050 was excavated by the team of Martin Pithon, from the French Institute for Preventive  
1051 Archaeological Research (INRAP) and the excavations occurred between July and August  
1052 2009. Based on the archaeological remains and radiocarbon dates, the site shows evidence of  
1053 occupation from the beginning of the Roman Empire to modern times. The project was  
1054 initialised under the request of the city of Angers given the plan for public construction  
1055 affecting the archaeological site. The archaeological study of the site was authorised by the  
1056 Regional Division for Cultural Affairs (Délégation Régional des affaires culturelles) and the  
1057 INRAP. Finally, the excavations in the archaeological site in Chéméré (south shore of the  
1058 Loire) started in the 60s but the two individuals sequenced in this study belong to a group of  
1059 181 individuals found in the last excavations in 2007. These excavations were led by an INRAP  
1060 archaeological team under a project of preventive archaeology before construction of a  
1061 pavilion. For more details on the description of the sites see Supplementary Material Online.

1062 aDNA library preparation and bioinformatic processing

1063 One DNA extraction (following a modified version of the extraction method from(76–78) and  
1064 one to two single indexed blunt end libraries(79) were prepared for each of the six ancient  
1065 samples (fra001, fra004, fra008, fra009, fra016 and fra017). The DNA libraries were sequenced  
1066 in two batches and over multiple lanes, first as a pilot run at the SciLife Sequencing Centre in  
1067 Uppsala, Sweden, using Illumina HiSeq 2500 with paired-end 125 bp chemistry, and later in  
1068 more depth at the CNRGH (Evry, France) using Illumina HiSeq X and with a paired-end 150  
1069 bp chemistry. Raw reads were trimmed with CutAdapt version 2.3(80) using the parameters --  
1070 quality-base 33, --quality-cutoff 15, -e 0.2, --trim-n and --minimum-length 15. Overlapping  
1071 read pairs were then merged using FLASH version 1.2.11(81) and with parameters --min-  
1072 overlap 11, --max-overlap 150 and --allow-outies. Merged fastq files were mapped to the  
1073 human reference genome hs37d5 as single end reads using bwa-aln version 0.7.17(82) and  
1074 parameters -l 16500, -n 0.01 and -o 2, as suggested for ancient DNA(83,84).

1075 BAM files were merged to a per sample library level using the merge command in Samtools  
1076 version 1.5 (85) before PCR duplicates were removed (reads with identical start and end  
1077 positions were identified and collapsed) by a modified version of FilterUniqSAMPCons\_cc.py,  
1078 which ensures random assignment of bases in a 50/50 case. All reads longer than 35 base pairs  
1079 and with less than 10% mismatches to the reference were kept, and a final merging step was  
1080 performed for those samples with two sequenced libraries by merging the processed sample  
1081 library BAMs to a final sample BAM.

1082 Processed sample BAM files were then used to call pseudo-haploid genotypes using Samtools  
1083 and the option *mpileup -R -B -q30 -Q30*. In order to merge with available datasets, the pseudo-  
1084 haploid calling was carried out on the 593,124 autosomal sites on the Human Origins Array  
1085 (Affymetrix). Contamination was estimated based on the X-chromosome and mitochondrial  
1086 DNA using ANGSD(86) and schmutzi(87), respectively. Sample quality, inferred sex and  
1087 contamination estimates are shown in the Table S2.1.

## 1088 **Acknowledgments**

1089  
1090 This study received financial support from the Regional Council of Pays-de-la-Loire  
1091 (VaCaRMe) and the Agence Nationale de la Recherche in France (ANR; FROGH, ANR-16-  
1092 599-CE12-0033). The PREGO bio-bank was built with the strong support from the  
1093 Etablissement Français du Sang (EFS) and the Centre for Biological Resources (CRB) of CHU  
1094 Nantes (BB-0033-00040). I.A. received funds from the People Programme (Marie Curie  
1095 Actions) of the European Union's Seventh Framework Programme (FP7/2007-2013) under  
1096 REA grant agreement PCOFUND-GA-2013-609102, through the PRESTIGE programme  
1097 (PRESTIGE-2017-4-0018) coordinated by Campus France. J.G. and R.R. were supported the  
1098 Regional Council of Pays-de-la-Loire (GRIOTE) and the ANR (GenSud: ANR-14-CE10-  
1099 0001). The GAZEL Cohort Study was funded by EDF-GDF and INSERM, and received grants  
1100 from the 'Cohortes Santé TGIR Program' of the ANR (ANR-08-BLAN-0028), Agence  
1101 française de sécurité sanitaire de l'environnement et du travail (AFSSET; EST-2008/1/35),  
1102 CAMIEG (Caisse d'assurance maladie des industries électrique et gazière) and CCAS (Caisse  
1103 Centrale d'Activités Sociales du Personnel des Industries Électriques et Gazières). The  
1104 extraction and WGS sequencing of blood samples was supported by the Laboratory of  
1105 Excellence GENMED (ANR; grant no. ANR-10-LABX-0013, PIA: "Investissements  
1106 d'Avenir" program). We also thank the CEPH-Biobank team for their involvement in DNA  
1107 extractions for the GAZEL cohort. This work was supported by the France Génomique National  
1108 infrastructure, funded as part of the PIA managed by the ANR (contract ANR-10-INBS-09).  
1109 The authors also wish to thank the Fondation Genavie for its financial support. We are most  
1110 grateful to the Genomics & Bioinformatics Core Facilities of Nantes (GenoA & BiRD,  
1111 Biogenouest) and the Institut Français de Bioinformatique (IFB; ANR-11-INBS-0013) for their  
1112 technical support. This work was supported by the *Institut National de Recherches*  
1113 *Archéologiques Préventives* (Inrap), funded as part of the days allocated to research.

## 1114 Bibliography

- 1115 1. Mathieson I, McVean G. Differential confounding of rare and common variants in spatially  
1116 structured populations. *Nat Genet.* 2012 Feb 5;44(3):243–6.
- 1117 2. Consortium TG of the N, Francioli LC, Menelaou A, Pulit SL, Dijk F van, Palamara PF, et  
1118 al. Whole-genome sequence variation, population structure and demographic history of the  
1119 Dutch population. *Nat Genet.* 2014 Aug;46(8):818.
- 1120 3. Bycroft C, Fernandez-Rozadilla C, Ruiz-Ponte C, Quintela I, Carracedo Á, Donnelly P, et  
1121 al. Patterns of genetic differentiation and the footprints of historical migrations in the  
1122 Iberian Peninsula. *Nat Commun.* 2019 Feb 1;10(1):551.
- 1123 4. Gilbert E, O'Reilly S, Merrigan M, McGettigan D, Molloy AM, Brody LC, et al. The Irish  
1124 DNA Atlas: Revealing Fine-Scale Population Structure and History within Ireland. *Sci*  
1125 *Rep.* 2017 08;7(1):17199.
- 1126 5. Leslie S, Winney B, Hellenthal G, Davison D, Boumertit A, Day T, et al. The fine-scale  
1127 genetic structure of the British population. *Nature.* 2015 Mar 19;519(7543):309–14.
- 1128 6. GIOT P.-R., HALLEGOUËT B., MONNIER J.-L., TALEC L. Le Paléolithique supérieur  
1129 du Pays de Léon (Finistère). Les gisements de Pontusval (Brignogan) et Enez-Amon-ar-  
1130 Ross (Kerlouan). *Anthropol L.* 1976;80(4):603–24.
- 1131 7. Paulsson BS. Radiocarbon dates and Bayesian modeling support maritime diffusion model  
1132 for megaliths in Europe. *Proc Natl Acad Sci.* 2019 Feb 26;116(9):3460–5.
- 1133 8. Perrin T, Manen C, Valdeyron N, Guilaine J. Beyond the sea\ldots The Neolithic transition  
1134 in the southwest of France. *Quat Int.* 2017 May;470:318–32.
- 1135 9. Marchand G, Manen C. Le rôle du Néolithique ancien méditerranéen dans la néolithisation  
1136 de l'Europe atlantique. :21.
- 1137 10. Rivollat M, Jeong C, Schiffels S, Küçükkalıpçı İ, Pemonge MH, Rohrlach AB, et al.  
1138 Ancient genome-wide DNA from France highlights the complexity of interactions between  
1139 Mesolithic hunter-gatherers and Neolithic farmers. *Sci Adv.* 2020 May;6(22):eaaz5344.
- 1140 11. Brunel S, Bennett EA, Cardin L, Garraud D, Barrand Emam H, Beylier A, et al.  
1141 Ancient genomes from present-day France unveil 7,000 years of its demographic history.  
1142 *Proc Natl Acad Sci U S A.* 2020 Jun 9;117(23):12791–8.
- 1143 12. Seguin-Orlando A, Donat R, Der Sarkissian C, Southon J, Thèves C, Manen C, et al.  
1144 Heterogeneous Hunter-Gatherer and Steppe-Related Ancestries in Late Neolithic and Bell  
1145 Beaker Genomes from Present-Day France. *Curr Biol CB.* 2021 Mar 8;31(5):1072-  
1146 1083.e10.
- 1147 13. Sheridan A. The Neolithization of Britain and Ireland: The 'big picture'. *Landsc*  
1148 *Transit.* 2010 Jan 1;89–105.
- 1149 14. Nicolas C. Arrows of Power from Brittany to Denmark (2500–1700 BC). *Proc Prehist*  
1150 *Soc.* 2017 Sep;83:247–87.
- 1151 15. Fitzpatrick A, Delibes G, Guerra E, Velasco J. Bell Beaker connections along the  
1152 Atlantic façade: the gold ornaments from Tablada del Rudrón, Burgos, Spain. In: *Analysis*  
1153 *of the economic foundations supporting the social supremacy of the Beaker groups*  
1154 *Proceedings of the XVII UISPP World Congress (1-7 september, Burgos, Spain).* 2016. p.  
1155 37–54.
- 1156 16. SALANOVA L. Le rôle de la façade atlantique dans la genèse du Campaniforme en  
1157 Europe. *Bull Société Préhistorique Fr.* 2004;101(2):223–6.
- 1158 17. Allen MJ, Gardiner J, Sheridan A. *Is There a British Chalcolithic?: People, Place and*  
1159 *Polity in the Later 3rd Millennium.* Har/Cdr édition. Oxford : Oakville, CT: Oxbow Books;  
1160 2012. 336 p.
- 1161 18. Olalde I, Brace S, Allentoft ME, Armit I, Kristiansen K, Booth T, et al. The Beaker  
1162 phenomenon and the genomic transformation of northwest Europe. *Nature.* 2018 Mar  
1163 8;555(7695):190–6.

- 1164 19. Fischer CE, Lefort A, Pemonge MH, Couture-Veschambre C, Rottier S, Deguilloux  
1165 MF. The multiple maternal legacy of the Late Iron Age group of Urville-Nacqueville  
1166 (France, Normandy) documents a long-standing genetic contact zone in northwestern  
1167 France. *PLoS One*. 2018;13(12):e0207459.
- 1168 20. Camby C. Limites politiques oubliées : Armorique et Bretagne - Critique de sources.  
1169 *Mém Société Archéologique Hist Bretagne* - 2008. 2008 Sep 15;LXXXVI:89.
- 1170 21. Maligorne Y. L'architecture romaine dans l'Ouest de la Gaule. [Internet]. Presses  
1171 Universitaires de Rennes (<http://www.pur-editions.fr/>); 2006 [cited 2021 Dec 14]. 229 p.  
1172 Available from: <https://hal.univ-brest.fr/hal-00449627>
- 1173 22. Kulikowski M, others. The western kingdoms. In: *The oxford handbook of Late*  
1174 *Antiquity*. Oxford University Press New York-Oxford; 2012. p. 31–59.
- 1175 23. Brett C. Brittany and the Carolingian Empire: A Historical Review. *Hist Compass*.  
1176 2013;11:268–79.
- 1177 24. Falc'hun F. Celtique continentale et celtique insulaire en breton. *Ann Bretagne Pays*  
1178 *Ouest*. 1963;70(4):425–54.
- 1179 25. Tanguy B. La limite linguistique dans la péninsule armoricaine à l'époque de  
1180 l'émigration bretonne (IVe-Ve siècle) d'après les données toponymiques. *Ann Bretagne*  
1181 *Pays Ouest*. 1980;87(3):429–62.
- 1182 26. Dû JL. Les atlas linguistiques: une fenêtre sur le passé des langues. *Atti Convegno*  
1183 *Internazionale Dove Va Dialettol* [Internet]. 2008 Jan 1 [cited 2021 Dec 14]; Available  
1184 from:  
1185 [https://www.academia.edu/11650304/Les\\_atlas\\_linguistiques\\_une\\_fen%C3%AAtre\\_sur\\_le](https://www.academia.edu/11650304/Les_atlas_linguistiques_une_fen%C3%AAtre_sur_le_pass%C3%A9_des_langues)  
1186 [\\_pass%C3%A9\\_des\\_langues](https://www.academia.edu/11650304/Les_atlas_linguistiques_une_fen%C3%AAtre_sur_le_pass%C3%A9_des_langues)
- 1187 27. Macaulay D. *The Celtic languages*. Cambridge: Cambridge University Press, 1993.  
1188 Pp. xvii+ 466. Cambridge: Cambridge University Press; 1993. 466 p.
- 1189 28. Catteddu I. Archéologie du premier Moyen Âge en Bretagne : nouveaux objets et  
1190 nouveaux scénarios pour « repenser » le premier Moyen Âge, in : BOUGET (H.),  
1191 COUMERT (M.) (dir.), . . , 6, Editions du CRBC, 2019, p. 483-499. In: *Quel Moyen Âge ?*  
1192 *La recherche en question* (ed Bouget H and Coumert M). Brest: CRBC; p. 483–99.  
1193 (Histoires des Breagnes; vol. 6).
- 1194 29. Earle T, Ling J, Uhnér C, Stos-Gale Z, Melheim L. The Political Economy and Metal  
1195 Trade in Bronze Age Europe: Understanding Regional Variability in Terms of  
1196 Comparative Advantages and Articulations. *Eur J Archaeol*. 2015;18(4):633–57.
- 1197 30. Lawson DJ, Hellenthal G, Myers S, Falush D. Inference of Population Structure using  
1198 Dense Haplotype Data. *PLOS Genet*. 2012 Jan 26;8(1):e1002453.
- 1199 31. Saint Pierre A, Giemza J, Alves I, Karakachoff M, Gaudin M, Amouyel P, et al. The  
1200 genetic history of France. *Eur J Hum Genet* [Internet]. 2020 Feb 10 [cited 2020 Feb 14];  
1201 Available from: <http://www.nature.com/articles/s41431-020-0584-1>
- 1202 32. Kerminen S, Havulinna AS, Hellenthal G, Martin AR, Sarin AP, Perola M, et al. Fine-  
1203 Scale Genetic Structure in Finland. *G3 Bethesda Md*. 2017 Oct 5;7(10):3459–68.
- 1204 33. Browning SR, Browning BL. Accurate Non-parametric Estimation of Recent  
1205 Effective Population Size from Segments of Identity by Descent. *Am J Hum Genet*. 2015  
1206 Sep 3;97(3):404–18.
- 1207 34. Athanasiadis G, Cheng JY, Vilhjálmsson BJ, Jørgensen FG, Als TD, Le Hellard S, et  
1208 al. Nationwide Genomic Study in Denmark Reveals Remarkable Population Homogeneity.  
1209 *Genetics*. 2016 Oct;204(2):711–22.
- 1210 35. Martin AR, Gignoux CR, Walters RK, Wojcik GL, Neale BM, Gravel S, et al. Human  
1211 Demographic History Impacts Genetic Risk Prediction across Diverse Populations. *Am J*  
1212 *Hum Genet*. 2017 Apr 6;100(4):635–49.

- 1213 36. Gao F, Keinan A. Explosive genetic evidence for explosive human population growth.  
1214 *Curr Opin Genet Dev.* 2016 Dec 1;41:130–9.
- 1215 37. Izdebski A, Guzowski P, Poniak R, Masci L, Palli J, Vignola C, et al. Palaeoecological  
1216 data indicates land-use changes across Europe linked to spatial heterogeneity in mortality  
1217 during the Black Death pandemic. *Nat Ecol Evol* [Internet]. 2022 Feb 10 [cited 2022 Feb  
1218 18]; Available from: <https://www.nature.com/articles/s41559-021-01652-4>
- 1219 38. O'Connor TD, Fu W, NHLBI GO Exome Sequencing Project, ESP Population  
1220 Genetics and Statistical Analysis Working Group ET, Mychaleckyj JC, Logsdon B, et al.  
1221 Rare variation facilitates inferences of fine-scale population structure in humans. *Mol Biol*  
1222 *Evol.* 2015 Mar;32(3):653–60.
- 1223 39. Mathieson I, McVean G. Demography and the Age of Rare Variants. *PLOS Genet.*  
1224 2014 Aug 7;10(8):e1004528.
- 1225 40. Xue Y, Mezzavilla M, Haber M, McCarthy S, Chen Y, Narasimhan V, et al.  
1226 Enrichment of low-frequency functional variants revealed by whole-genome sequencing of  
1227 multiple isolated European populations. *Nat Commun.* 2017 Jun 23;8:15927.
- 1228 41. Genetic Analysis of Psoriasis Consortium & the Wellcome Trust Case Control  
1229 Consortium 2, Strange A, Capon F, Spencer CCA, Knight J, Weale ME, et al. A genome-  
1230 wide association study identifies new psoriasis susceptibility loci and an interaction  
1231 between HLA-C and ERAP1. *Nat Genet.* 2010 Nov;42(11):985–90.
- 1232 42. International Multiple Sclerosis Genetics Consortium, Wellcome Trust Case Control  
1233 Consortium 2, Sawcer S, Hellenthal G, Pirinen M, Spencer CCA, et al. Genetic risk and a  
1234 primary role for cell-mediated immune mechanisms in multiple sclerosis. *Nature.* 2011  
1235 Aug 10;476(7359):214–9.
- 1236 43. Novembre J, Johnson T, Bryc K, Kutalik Z, Boyko AR, Auton A, et al. Genes mirror  
1237 geography within Europe. *Nature.* 2008 Nov 6;456(7218):98–101.
- 1238 44. Karakachoff M, Duforet-Frebourg N, Simonet F, Le Scouarnec S, Pellen N, Lecointe  
1239 S, et al. Fine-scale human genetic structure in Western France. *Eur J Hum Genet* [Internet].  
1240 2014 Sep 3; Available from: <http://dx.doi.org/10.1038/ejhg.2014.175>
- 1241 45. Hellenthal G, Busby GBJ, Band G, Wilson JF, Capelli C, Falush D, et al. A Genetic  
1242 Atlas of Human Admixture History. *Science.* 2014 Feb 14;343(6172):747–51.
- 1243 46. Patterson N, Moorjani P, Luo Y, Mallick S, Rohland N, Zhan Y, et al. Ancient  
1244 admixture in human history. *Genetics.* 2012 Nov;192(3):1065–93.
- 1245 47. Raghavan M, Skoglund P, Graf KE, Metspalu M, Albrechtsen A, Moltke I, et al.  
1246 Upper Palaeolithic Siberian genome reveals dual ancestry of Native Americans. *Nature.*  
1247 2014 Jan;505(7481):87–91.
- 1248 48. Allen Ancient DNA Resource (AADR) [Internet]. 2020. Available from:  
1249 [https://reich.hms.harvard.edu/allen-ancient-dna-resource-aadr-downloadable-genotypes-](https://reich.hms.harvard.edu/allen-ancient-dna-resource-aadr-downloadable-genotypes-present-day-and-ancient-dna-data)  
1250 [present-day-and-ancient-dna-data](https://reich.hms.harvard.edu/allen-ancient-dna-resource-aadr-downloadable-genotypes-present-day-and-ancient-dna-data)
- 1251 49. Margaryan A, Lawson DJ, Sikora M, Racimo F, Rasmussen S, Moltke I, et al.  
1252 Population genomics of the Viking world. *Nature.* 2020 Sep;585(7825):390–6.
- 1253 50. Haak W, Lazaridis I, Patterson N, Rohland N, Mallick S, Llamas B, et al. Massive  
1254 migration from the steppe was a source for Indo-European languages in Europe. *Nature.*  
1255 2015 Jun 11;522(7555):207–11.
- 1256 51. Schraiber JG, Akey JM. Methods and models for unravelling human evolutionary  
1257 history. *Nat Rev Genet.* 2015 Dec;16(12):727.
- 1258 52. Scotet V, Mérour MC, Mercier AY, Chanu B, Le Faou T, Raguénes O, et al.  
1259 Hereditary hemochromatosis: effect of excessive alcohol consumption on disease  
1260 expression in patients homozygous for the C282Y mutation. *Am J Epidemiol.* 2003 Jul  
1261 15;158(2):129–34.

- 1262 53. Lucotte G, Dieterlen F. A European allele map of the C282Y mutation of  
1263 hemochromatosis: Celtic versus Viking origin of the mutation? *Blood Cells Mol Dis*. 2003  
1264 Oct;31(2):262–7.
- 1265 54. Olalde I, Mallick S, Patterson N, Rohland N, Villalba-Mouco V, Silva M, et al. The  
1266 genomic history of the Iberian Peninsula over the past 8000 years. *Science*. 2019 Mar  
1267 15;363(6432):1230–4.
- 1268 55. Cassidy LM, Martiniano R, Murphy EM, Teasdale MD, Mallory J, Hartwell B, et al.  
1269 Neolithic and Bronze Age migration to Ireland and establishment of the insular Atlantic  
1270 genome. *Proc Natl Acad Sci U S A*. 2016 Jan 12;113(2):368–73.
- 1271 56. Burgess C, O'Connor B. Iberia, the Atlantic Bronze age and the Mediterranean.  
1272 *Contacto Cult Entre El Mediterráneo El Atlántico Siglos XII-VIII Ane Precolonización*  
1273 *Debate Ser Arqueol*. 2008;11:41–58.
- 1274 57. Gandois H, Burlot A, Mille B, Veslud CLC de. Early Bronze Age axe-ingots from  
1275 Brittany: evidence for connections with South-West Ireland? *Proc R Ir Acad Archaeol Cult*  
1276 *Hist Lit*. 2019;119 C:1.
- 1277 58. Gretzinger J, Sayer D, Justeau P, Altena E, Pala M, Dulias K, et al. The Anglo-Saxon  
1278 migration and the formation of the early English gene pool. *Nature*. 2022  
1279 Oct;610(7930):112–9.
- 1280 59. Cavalli-Sforza LL, Piazza A, Menozzi P, Mountain J. Reconstruction of human  
1281 evolution: bringing together genetic, archaeological, and linguistic data. *Proc Natl Acad*  
1282 *Sci U S A*. 1988 Aug;85(16):6002–6.
- 1283 60. Byrne RP, van Rheenen W, Project MinE ALS GWAS Consortium, van den Berg LH,  
1284 Veldink JH, McLaughlin RL. Dutch population structure across space, time and GWAS  
1285 design. *Nat Commun*. 2020 Sep 11;11(1):4556.
- 1286 61. Le Bris D. Concordances géolinguistiques et anthroponymiques en Bretagne. *Corpus*.  
1287 2013 Jan 1;(12):85–104.
- 1288 62. Martiniano R, Caffell A, Holst M, Hunter-Mann K, Montgomery J, Müldner G, et al.  
1289 Genomic signals of migration and continuity in Britain before the Anglo-Saxons. *Nat*  
1290 *Commun*. 2016 Jan 19;7:10326.
- 1291 63. Goldberg M, Leclerc A, Bonenfant S, Chastang JF, Schmaus A, Kaniewski N, et al.  
1292 Cohort profile: the GAZEL cohort study. *Int J Epidemiol*. 2007;36(1):32–9.
- 1293 64. Goldberg M, Leclerc A, Zins M. Cohort profile update: the GAZEL cohort study. *Int J*  
1294 *Epidemiol*. 2015;44(1):77–77g.
- 1295 65. Cingolani P, Platts A, Wang LL, Coon M, Nguyen T, Wang L, et al. A program for  
1296 annotating and predicting the effects of single nucleotide polymorphisms, SnpEff: SNPs in  
1297 the genome of *Drosophila melanogaster* strain w1118; iso-2; iso-3. *Fly (Austin)*. 2012  
1298 Jun;6(2):80–92.
- 1299 66. Delaneau O, Marchini J, Zagury JF. A linear complexity phasing method for  
1300 thousands of genomes. *Nat Methods*. 2011 Dec 4;9(2):179–81.
- 1301 67. Lawson DJ, Falush D. Population Identification Using Genetic Data. *Annu Rev*  
1302 *Genomics Hum Genet*. 2012;13(1):337–61.
- 1303 68. Cavalli-Sforza LL, Edwards AW. Phylogenetic analysis. Models and estimation  
1304 procedures. *Am J Hum Genet*. 1967 May;19(3 Pt 1):233–57.
- 1305 69. Legendre P, Lapointe F. Assessing congruence among distance matrices: Single-malt  
1306 Scotch whiskies revisited. *Aust N Z J Stat*. 2004 Dec 1;46:615–29.
- 1307 70. Patterson N, Price AL, Reich D. Population Structure and Eigenanalysis. *PLOS*  
1308 *Genet*. 2006 Dec 22;2(12):e190.
- 1309 71. Price AL, Weale ME, Patterson N, Myers SR, Need AC, Shianna KV, et al. Long-  
1310 Range LD Can Confound Genome Scans in Admixed Populations. *Am J Hum Genet*. 2008  
1311 Jul 11;83(1):132–5.



- 1312 72. Browning SR, Browning BL, Daviglus ML, Durazo-Arvizu RA, Schneiderman N,  
1313 Kaplan RC, et al. Ancestry-specific recent effective population size in the Americas. *PLoS*  
1314 *Genet.* 2018 May 24;14(5):e1007385.
- 1315 73. Alexander D.H, Novembre J, Lange K. Fast model-based estimation of ancestry in  
1316 unrelated individuals. *Genome Res* [Internet]. 2009 Sep [cited 2022 Jan 4];19(9). Available  
1317 from: <http://pubmed.ncbi.nlm.nih.gov/19648217/>
- 1318 74. Lazaridis I, Patterson N, Mittnik A, Renaud G, Mallick S, Kirsanow K, et al. Ancient  
1319 human genomes suggest three ancestral populations for present-day Europeans. *Nature.*  
1320 2014 Sep 18;513(7518):409–13.
- 1321 75. Mathieson I, Lazaridis I, Rohland N, Mallick S, Patterson N, Roodenberg SA, et al.  
1322 Genome-wide patterns of selection in 230 ancient Eurasians. *Nature.* 2015 Dec  
1323 24;528(7583):499–503.
- 1324 76. Yang DY, Eng B, Wayne JS, Dudar JC, Saunders SR. Technical note: improved DNA  
1325 extraction from ancient bones using silica-based spin columns. *Am J Phys Anthropol.* 1998  
1326 Apr;105(4):539–43.
- 1327 77. Malmström H, Svensson EM, Gilbert MTP, Willerslev E, Götherström A, Holmlund  
1328 G. More on contamination: the use of asymmetric molecular behavior to identify authentic  
1329 ancient human DNA. *Mol Biol Evol.* 2007 Apr;24(4):998–1004.
- 1330 78. Dabney J, Knapp M, Glocke I, Gansauge MT, Weihmann A, Nickel B, et al.  
1331 Complete mitochondrial genome sequence of a Middle Pleistocene cave bear reconstructed  
1332 from ultrashort DNA fragments. *Proc Natl Acad Sci U S A.* 2013 Sep 24;110(39):15758–  
1333 63.
- 1334 79. Meyer M, Kircher M. Illumina sequencing library preparation for highly multiplexed  
1335 target capture and sequencing. *Cold Spring Harb Protoc.* 2010 Jun;2010(6):pdb.prot5448.
- 1336 80. Martin M. Cutadapt removes adapter sequences from high-throughput sequencing  
1337 reads. *EMBnet.journal.* 2011 May 2;17(1):10–2.
- 1338 81. Magoč T, Salzberg SL. FLASH: fast length adjustment of short reads to improve  
1339 genome assemblies. *Bioinforma Oxf Engl.* 2011 Nov 1;27(21):2957–63.
- 1340 82. Li H, Durbin R. Fast and accurate short read alignment with Burrows-Wheeler  
1341 transform. *Bioinforma Oxf Engl.* 2009 Jul 15;25(14):1754–60.
- 1342 83. Skoglund P, Malmström H, Omrak A, Raghavan M, Valdiosera C, Günther T, et al.  
1343 Genomic Diversity and Admixture Differs for Stone-Age Scandinavian Foragers and  
1344 Farmers. *Science.* 2014 May;344(6185):747–50.
- 1345 84. Kircher M. Analysis of high-throughput ancient DNA sequencing data. *Methods Mol*  
1346 *Biol Clifton NJ.* 2012 Jan 1;840:197–228.
- 1347 85. Li H, Handsaker B, Wysoker A, Fennell T, Ruan J, Homer N, et al. The Sequence  
1348 Alignment/Map format and SAMtools. *Bioinformatics.* 2009 Aug 15;25(16):2078–9.
- 1349 86. Korneliussen TS, Albrechtsen A, Nielsen R. ANGSD: Analysis of Next Generation  
1350 Sequencing Data. *BMC Bioinformatics.* 2014 Nov 25;15(1):356.
- 1351 87. Renaud G, Slon V, Duggan AT, Kelso J. Schmutzi: estimation of contamination and  
1352 endogenous mitochondrial consensus calling for ancient DNA. *Genome Biol.* 2015 Oct  
1353 12;16(1):224.
- 1354  
1355

1356  
1357  
1358  
1359

**Table 1.** *qpAdm* results for one-way and two-way models used to estimate the ancestry of Mediaeval and present-day individuals from France. Only models with p-value > 0.05 are reported.

| Target | Source 1   | Source 2                 | p-value | Prop 1 | Prop 2 | std error |
|--------|------------|--------------------------|---------|--------|--------|-----------|
| WBR    | FRMedieval | -                        | 0.0679  | -      | -      |           |
| WBR    | FRMedieval | English                  | 0.5338  | 0.009  | 0.991  | 0.262     |
| WBR    | FRMedieval | England_Roman.SG         | 0.9026  | 0.061  | 0.939  | 0.230     |
| WBR    | FRMedieval | Norwegian                | 0.9645  | 0.333  | 0.667  | 0.080     |
| WBR    | FRMedieval | Orcadian                 | 0.6743  | 0.337  | 0.663  | 0.100     |
| WBR    | FRMedieval | Vikings                  | 0.4740  | 0.338  | 0.662  | 0.386     |
| WBR    | FRMedieval | Scottish                 | 0.9438  | 0.386  | 0.614  | 0.090     |
| WBR    | FRMedieval | Icelandic                | 0.7598  | 0.414  | 0.586  | 0.082     |
| WBR    | FRMedieval | England_Saxon.SG         | 0.4363  | 0.468  | 0.532  | 0.125     |
| WBR    | FRMedieval | Iceland_Pre_Christian.SG | 0.2734  | 0.551  | 0.449  | 0.114     |
| WBR    | FRMedieval | Ireland_BA.SG            | 0.6912  | 0.569  | 0.431  | 0.103     |
| EBP    | FRMedieval | -                        | 0.3551  | -      | -      |           |
| EBP    | FRMedieval | Hungarian                | 0.7005  | 0.369  | 0.631  | 0.169     |
| EBP    | FRMedieval | Germany_EMedieval.SG     | 0.7579  | 0.392  | 0.608  | 0.171     |
| EBP    | FRMedieval | England_Roman.SG         | 0.7827  | 0.397  | 0.603  | 0.303     |
| EBP    | FRMedieval | English                  | 0.5775  | 0.437  | 0.563  | 0.216     |
| EBP    | FRMedieval | Vikings                  | 0.8665  | 0.480  | 0.520  | 0.115     |
| EBP    | FRMedieval | Norwegian                | 0.9295  | 0.514  | 0.486  | 0.100     |
| EBP    | FRMedieval | Orcadian                 | 0.8039  | 0.531  | 0.469  | 0.114     |
| EBP    | FRMedieval | Scottish                 | 0.9340  | 0.548  | 0.452  | 0.104     |
| EBP    | FRMedieval | Icelandic                | 0.8634  | 0.561  | 0.439  | 0.100     |
| EBP    | FRMedieval | Iceland_Pre_Christian.SG | 0.6714  | 0.651  | 0.349  | 0.114     |
| EBP    | FRMedieval | England_Saxon.SG         | 0.6094  | 0.660  | 0.340  | 0.130     |
| EBP    | FRMedieval | Ireland_BA.SG            | 0.7875  | 0.695  | 0.305  | 0.106     |
| NOR    | FRMedieval | -                        | 0.1628  | -      | -      |           |
| NOR    | FRMedieval | England_Roman.SG         | 0.6352  | 0.236  | 0.764  | 0.276     |
| NOR    | FRMedieval | Hungarian                | 0.2784  | 0.295  | 0.705  | 0.300     |
| NOR    | FRMedieval | Germany_EMedieval.SG     | 0.2726  | 0.404  | 0.596  | 0.295     |
| NOR    | FRMedieval | Vikings                  | 0.4790  | 0.459  | 0.541  | 0.140     |
| NOR    | FRMedieval | Norwegian                | 0.4225  | 0.551  | 0.449  | 0.133     |
| NOR    | FRMedieval | Scottish                 | 0.5091  | 0.563  | 0.437  | 0.130     |
| NOR    | FRMedieval | Orcadian                 | 0.3055  | 0.575  | 0.425  | 0.160     |
| NOR    | FRMedieval | Icelandic                | 0.3413  | 0.612  | 0.388  | 0.130     |
| NOR    | FRMedieval | Iceland_Pre_Christian.SG | 0.3397  | 0.640  | 0.360  | 0.130     |
| NOR    | FRMedieval | Ireland_BA.SG            | 0.4111  | 0.696  | 0.304  | 0.125     |
| NOR    | FRMedieval | English                  | 0.1308  | 0.746  | 0.254  | 0.701     |
| NOR    | FRMedieval | England_Saxon.SG         | 0.1839  | 0.748  | 0.252  | 0.190     |
| HAU    | FRMedieval | -                        | 0.5685  | -      | -      |           |
| HAU    | FRMedieval | English                  | 0.8013  | 0.479  | 0.521  | 0.193     |
| HAU    | FRMedieval | England_Roman.SG         | 0.9115  | 0.486  | 0.514  | 0.204     |
| HAU    | FRMedieval | Hungarian                | 0.7682  | 0.515  | 0.485  | 0.169     |
| HAU    | FRMedieval | Norwegian                | 0.9407  | 0.589  | 0.411  | 0.107     |
| HAU    | FRMedieval | Vikings                  | 0.8224  | 0.605  | 0.395  | 0.134     |
| HAU    | FRMedieval | Germany_EMedieval.SG     | 0.6659  | 0.616  | 0.384  | 0.247     |
| HAU    | FRMedieval | Orcadian                 | 0.8163  | 0.630  | 0.370  | 0.131     |
| HAU    | FRMedieval | Icelandic                | 0.8971  | 0.631  | 0.369  | 0.108     |
| HAU    | FRMedieval | Scottish                 | 0.8971  | 0.638  | 0.362  | 0.120     |
| HAU    | FRMedieval | Iceland_Pre_Christian.SG | 0.8094  | 0.694  | 0.306  | 0.114     |
| HAU    | FRMedieval | England_Saxon.SG         | 0.7117  | 0.729  | 0.271  | 0.141     |
| HAU    | FRMedieval | Ireland_BA.SG            | 0.8836  | 0.734  | 0.266  | 0.104     |

1360 **Table 1** (continued)

| Target | Source 1   | Source 2                  | p-value | Prop 1 | Prop 2 | std error |
|--------|------------|---------------------------|---------|--------|--------|-----------|
| GRA    | FRMedieval | -                         | 0.7582  | -      | -      |           |
| GRA    | FRMedieval | Hungarian                 | 0.8134  | 0.680  | 0.320  | 0.188     |
| GRA    | FRMedieval | Germany_EMedieval.SG      | 0.7388  | 0.812  | 0.188  | 0.235     |
| GRA    | FRMedieval | Vikings                   | 0.7452  | 0.831  | 0.169  | 0.175     |
| GRA    | FRMedieval | Norwegian                 | 0.7569  | 0.846  | 0.154  | 0.150     |
| GRA    | FRMedieval | Scottish                  | 0.7496  | 0.866  | 0.134  | 0.148     |
| GRA    | FRMedieval | Icelandic                 | 0.7235  | 0.889  | 0.111  | 0.155     |
| GRA    | FRMedieval | Orcadian                  | 0.7141  | 0.897  | 0.103  | 0.179     |
| GRA    | FRMedieval | Ireland_BA.SG             | 0.7502  | 0.901  | 0.099  | 0.116     |
| GRA    | FRMedieval | England_Roman.SG          | 0.7331  | 0.905  | 0.095  | 0.286     |
| GRA    | FRMedieval | Iceland_Pre_Christian.SG  | 0.7180  | 0.921  | 0.079  | 0.153     |
| GRA    | FRMedieval | English                   | 0.6927  | 0.961  | 0.039  | 0.287     |
| GRA    | FRMedieval | Iberia_Medieval_published | 0.7869  | 0.988  | 0.012  | 0.307     |
| GRA    | FRMedieval | England_Saxon.SG          | 0.6917  | 0.989  | 0.011  | 0.176     |
| CEN    | FRMedieval | -                         | 0.5725  | -      | -      |           |
| CEN    | FRMedieval | Hungarian                 | 0.5170  | 0.825  | 0.175  | 0.266     |
| CEN    | FRMedieval | Vikings                   | 0.5265  | 0.855  | 0.145  | 0.199     |
| CEN    | FRMedieval | Norwegian                 | 0.5286  | 0.884  | 0.116  | 0.163     |
| CEN    | FRMedieval | Scottish                  | 0.5180  | 0.912  | 0.088  | 0.162     |
| CEN    | FRMedieval | Germany_EMedieval.SG      | 0.5012  | 0.917  | 0.083  | 0.334     |
| CEN    | FRMedieval | Ireland_BA.SG             | 0.5366  | 0.917  | 0.083  | 0.130     |
| CEN    | FRMedieval | Icelandic                 | 0.4998  | 0.940  | 0.060  | 0.168     |
| CEN    | FRMedieval | England_Roman.SG          | 0.5335  | 0.941  | 0.059  | 0.359     |
| CEN    | FRMedieval | Iceland_Pre_Christian.SG  | 0.5143  | 0.943  | 0.057  | 0.160     |
| CEN    | FRMedieval | Orcadian                  | 0.4926  | 0.973  | 0.027  | 0.200     |
| CEN    | FRMedieval | Iberia_Medieval_published | 0.7578  | 0.997  | 0.003  | 0.296     |
| SLO    | FRMedieval | -                         | 0.7921  | -      | -      |           |
| SLO    | FRMedieval | Hungarian                 | 0.8100  | 0.734  | 0.266  | 0.201     |
| SLO    | FRMedieval | Vikings                   | 0.7962  | 0.814  | 0.186  | 0.171     |
| SLO    | FRMedieval | Germany_EMedieval.SG      | 0.7660  | 0.834  | 0.166  | 0.240     |
| SLO    | FRMedieval | Norwegian                 | 0.7981  | 0.841  | 0.159  | 0.147     |
| SLO    | FRMedieval | Spanish_North             | 0.7422  | 0.845  | 0.155  | 0.547     |
| SLO    | FRMedieval | England_Roman.SG          | 0.7864  | 0.857  | 0.143  | 0.268     |
| SLO    | FRMedieval | Scottish                  | 0.7816  | 0.874  | 0.126  | 0.146     |
| SLO    | FRMedieval | Icelandic                 | 0.7708  | 0.879  | 0.121  | 0.148     |
| SLO    | FRMedieval | English                   | 0.7452  | 0.882  | 0.118  | 0.263     |
| SLO    | FRMedieval | Orcadian                  | 0.7568  | 0.887  | 0.113  | 0.171     |
| SLO    | FRMedieval | Ireland_BA.SG             | 0.7769  | 0.910  | 0.090  | 0.119     |
| SLO    | FRMedieval | Iceland_Pre_Christian.SG  | 0.7520  | 0.922  | 0.078  | 0.146     |
| SLO    | FRMedieval | Iberia_Celtiberian        | 0.6461  | 0.958  | 0.042  | 0.287     |
| SLO    | FRMedieval | England_Saxon.SG          | 0.7308  | 0.974  | 0.026  | 0.168     |
| SLO    | FRMedieval | Iberia_Medieval_published | 0.6612  | 0.986  | 0.014  | 0.355     |
| SLO    | FRMedieval | Basque                    | 0.7237  | 0.993  | 0.007  | 0.355     |
| NOU    | FRMedieval | -                         | 0.7250  | -      | -      |           |
| NOU    | FRMedieval | Spanish_North             | 0.9240  | 0.311  | 0.689  | 0.304     |
| NOU    | FRMedieval | Basque                    | 0.7515  | 0.642  | 0.358  | 0.263     |
| NOU    | FRMedieval | Iberia_IA                 | 0.6964  | 0.863  | 0.137  | 0.254     |
| NOU    | FRMedieval | Iberia_Celtiberian        | 0.6659  | 0.865  | 0.135  | 0.254     |
| NOU    | FRMedieval | Iberia_Medieval_published | 0.7030  | 0.914  | 0.086  | 0.287     |
| NOU    | FRMedieval | Sardinian                 | 0.6689  | 0.957  | 0.043  | 0.088     |

1361

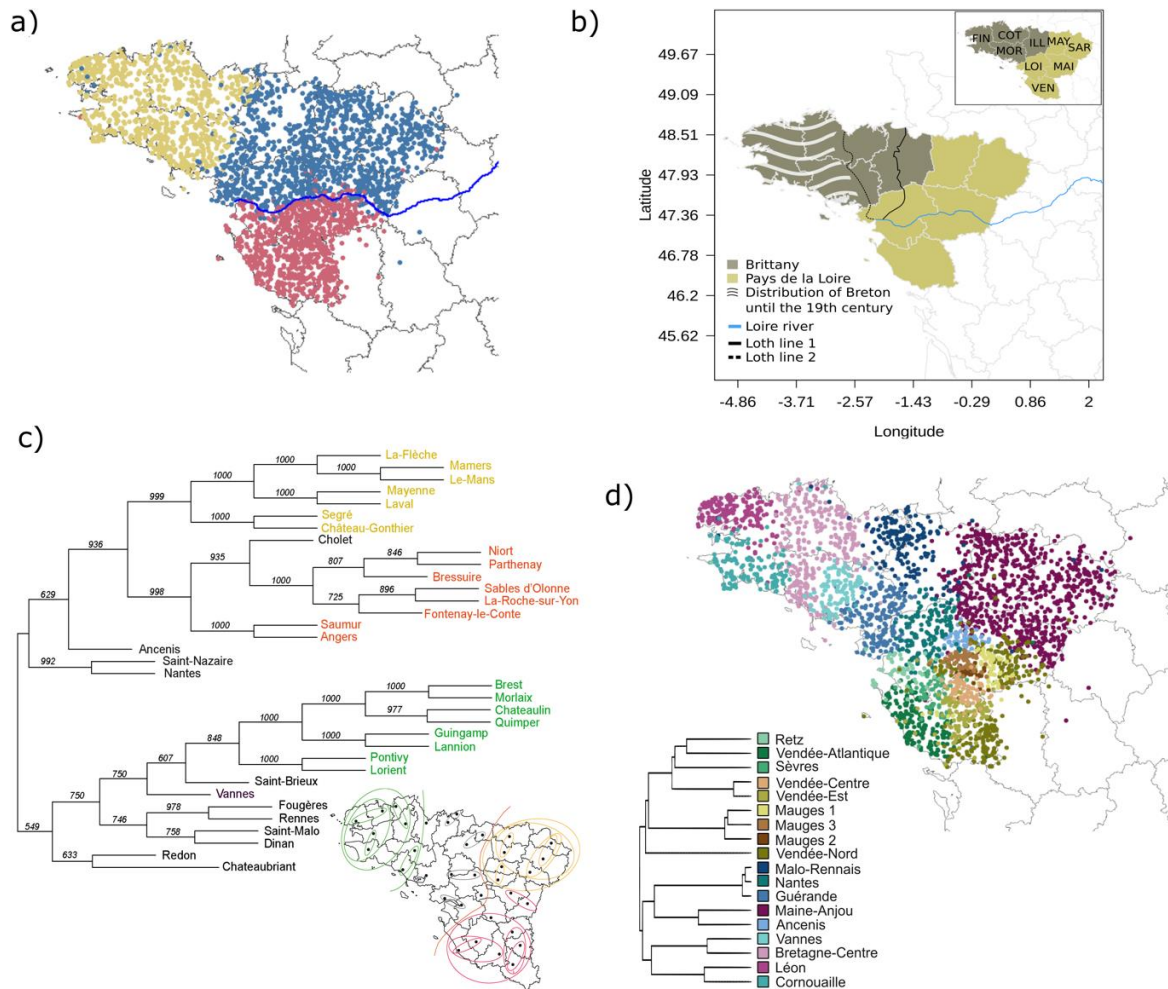

1362

1363

1364

**Figure 1. Population structure, linguistics, and patronym distribution in Northwestern France**

1365

1366

1367

1368

1369

1370

1371

1372

1373

1374

1375

1376

1377

1378

1379

1380

1381

1382

1383

1384

1385

(a) fineSTRUCTURE clustering of 3,234 samples from Brittany and the downstream Loire basin at  $k=3$ . (b) Distribution of the Breton language over time (adapted from the *Celtic languages Donald MacAulay Cambridge University Press page 373*). Loth line 1, attested by the border between Celtic place names in  $-ac$  (on the west side) and Romance place names in  $-é$  (on the east side), represents the westernmost boundary between Armorican Gaulish and Gallo-Romance spoken varieties (25). Loth line 2 represents the Celto-Romance linguistic border in the 16th century CE. Grey lines encircle political territorial divisions called *départements*. Only *départements* belonging to the regions of Brittany and *Pays-de-la-Loire* are coloured. In the inset, the *départements* are abbreviated as FIN (Finistère), COT (Côtes-d’Armor), MOR (Morbihan), ILL (Ille-et-Vilaine), MAY (Mayenne), SAR (Sarthe), MAI (Maine-et-Loire), LOI (Loire-Atlantique), VEN (Vendée). (c) Neighbour Joining tree from pairwise ArcCos distances (68) computed on the distribution of surnames between pairs of *arrondissements* from Northwestern France. The support of the tree nodes was obtained by bootstrapping 1,000 times the distance matrices. (d) 18 genetic clusters identified using total variation distances (TVD) from the fineSTRUCTURE results (see Material and Methods for details). The TVD-based tree was cut at  $k=39$  and to ease visualisation we merged clusters with  $<5$  individuals into the closest cluster ( $\geq 31$  individuals) resulting in a tree with 18 clusters. All the clusters have at least 31 individuals. The TVD-based tree is sample size independent and is more informative on cluster genetic affinities (31). In (a) and (c), individuals are coloured according to their cluster assignment. Individuals’ coordinates correspond to the most common grandparents’ birthplace.

1386

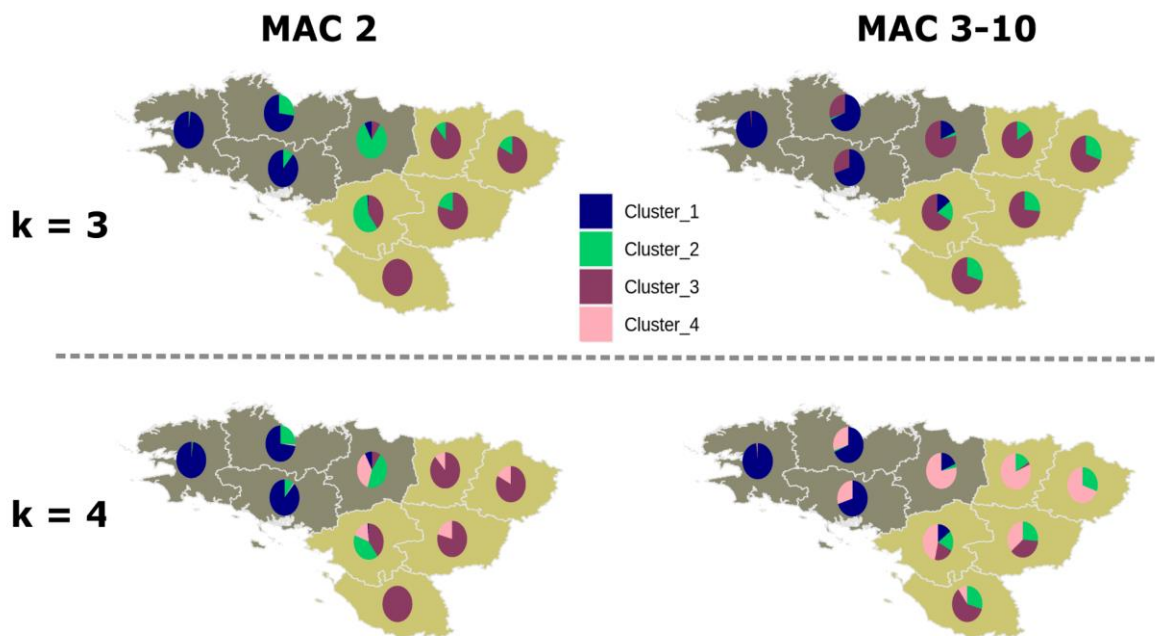

1387

1388

1389

1390

1391

1392

1393

**Figure 2. Allele sharing within and between populations.** Proportions of individuals assigned to different clusters for each *département* in Northwestern France (see Fig. 1b), using hierarchical clustering on levels of rare allele sharing between pairs of individuals. Allele-sharing matrices were computed for alleles present in two chromosomes (MAC 2) and three to 10 chromosome copies (MAC 3-10) across individuals from Northwestern France and from one million randomly selected sites.

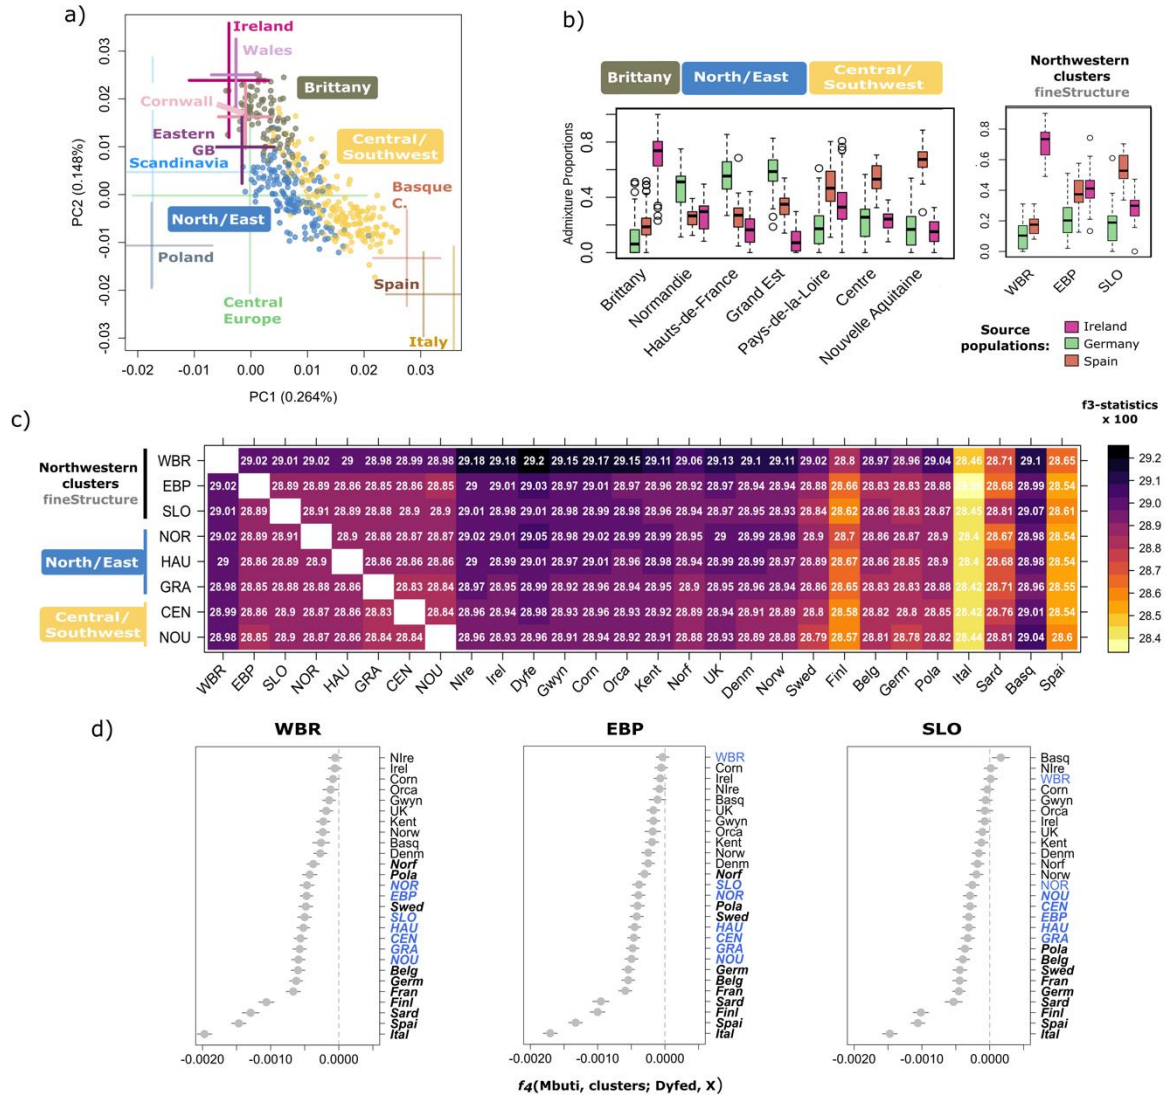

1394  
1395

1396 **Figure 3. Genetic affinities between Brittany and Ireland/West British Isles**  
 1397 **(a)** The two first principal components of genetic variation in the “modern merged dataset”,  
 1398 which includes 843 French WGSs for which the four grand-parent origin was concordant, and  
 1399 genome-wide data from 20 central and western European populations (population acronyms  
 1400 below, see Methods for further details). To avoid bias due to sample size differences among  
 1401 regions all locations are represented by a maximum of 100 individuals resulting in a total of  
 1402 2,070 samples and 201,999 independent SNPs. For simpler visualisation samples from Norway,  
 1403 Sweden and Denmark were labelled as “Scandinavia”, samples from Belgium and Germany  
 1404 were labelled as “Central Europe”. FranceGenRef samples are represented by dots and labelled  
 1405 with boxes while non-French samples are represented by 2sd of the two PCs. UK samples other  
 1406 than those from the POBI dataset, whose origin of the grandparents is known, are not shown.  
 1407 Similarly, French samples from public datasets are also not shown. To better visualise the  
 1408 distribution of our samples the plot is a zoom of the full PCA (Fig. S3.1). **(b)** Ancestry  
 1409 proportions retrieved from a Supervised Admixture analysis considering Ireland, Spain and  
 1410 Germany as proxy source populations on the basis of their polarised positions relative to the  
 1411 distribution of the French samples on panel (a). **(c)** Heatmap reporting outgroup  $f_3$ -statistics in

1412 the form  $f_3(\text{Mbuti; French population/cluster, X})$ , where French population/cluster is  
1413 represented on the y-axis and X on the x-axis. (**d**)  $f_4$ -statistics of the form  $f_4(\text{Mbuti, French}$   
1414  $\text{cluster; Dyfed, X})$ , where X are the populations on the right side of the plot. Due to disparities  
1415 in samples sizes, both the outgroup  $f_3$ - and  $f_4$ -statistics were computed on a maximum of 25  
1416 samples per population. In bold are represented  $f_4$ -statistics values with a corresponding  $|Z| >$   
1417 3. Cluster acronyms: western Brittany (WBR), eastern Brittany and *Pays-de-la-Loire* (EBP),  
1418 south Loire (SLO). Region/country acronyms: Brittany (BRI); *Pays-de-la-Loire* (PAY);  
1419 *Normandie* (NOR); *Hauts-de-France* (HAU); *Grand Est* (GRA); *Centre-Val de Loire* (CEN);  
1420 *Nouvelle-Aquitaine* (NOU), Basque Country (Basq), Belgium (Belg), Cornwall (Corn),  
1421 Denmark (Denm), Dyfed (Dyfe), Finland (Finl), Germany (Germ), Gwynedd (Gwyn), Ireland  
1422 (Irel), Italy (Ital), Kent (Kent), Norfolk (Norf), Northern Ireland (NIrel), Norway (Norw),  
1423 Orkney Islands (Orca), Poland (Pola), Sardinia (Sard), Spain (Spai), Sweden (Swed), United  
1424 Kingdom (UK).  
1425

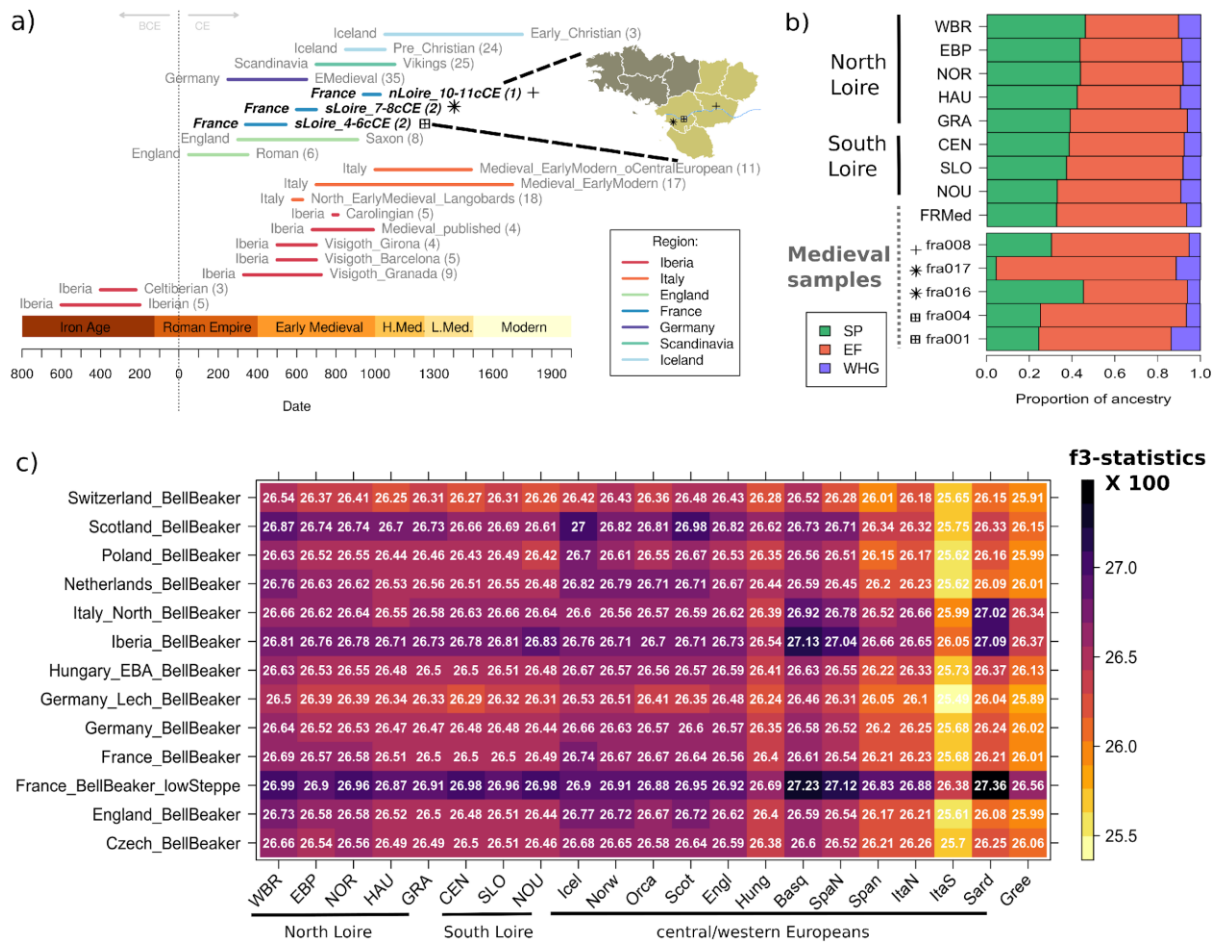

1426

1427

1428 **Figure 4. Genetic continuity, admixture and relationship between modern and ancient**  
 1429 **French populations**

1430 (a) Timeline of the ancient individuals used to test one- and two-way models of admixture to  
 1431 explain the ancestry of present-day French using *qpAdm*. (b) Mixture proportions from the three  
 1432 major populations contributing to the European ancestry using three-way admixture model,  
 1433 where each population on the left (y-axis) is modelled as a mixture of Mesolithic Western  
 1434 Hunter-Gatherer- (WHG), Neolithic early farmers- (EF) and Early Bronze Age Steppe- (SP)  
 1435 derived ancestry. (c) Shared drift between Bell-Beaker-associated individuals and present-day  
 1436 Europeans by means of the outgroup  $f_3$ -statistics of the form  $f_3(\text{Mbuti}; \text{Bell Beaker Pop}, X)$ ,  
 1437 where X is the population on the x-axis. These analyses were performed on the “ancient merged  
 1438 dataset” (see Material and Methods for details).  
 1439
